# Supplementary material for: Root Microbiota in Primary and Secondary Apical Periodontitis
Source: Front Microbiol. 2018 Oct 9;9:2374. doi: 10.3389/fmicb.2018.02374 (PMC6189451; doi:10.3389/fmicb.2018.02374)
Supplement: Supplementary file 2 [file Table_2.XLSX]

## Sheet: Table S2
	Table S2. Operational taxonomic units (OTUs) counts in normalized data set. After removal of reads corresponding to putative contaminant OTUs, each sample was normalized to 14,000 merged reads. Samples with <14,000 reads were not analysed and they are not presented.
	OTU ID	OTU Taxonomy a						Top USEARCH hit(s) against EzBioCloud database		Top USEARCH hit(s) against HOMD		Counts
		Phylum	Class	Order	Family	Genus	Species	Percent identity	Species	Percent identity	Species	PAP13C b	PAP17C	PAP19C	PAP20C	PAP21C	PAP23C	PAP28C	PAP30C	PAP31C	PAP33C	PAP36C	PAP37C	PAP38C	PAP40C	PAP41C	PAP42C	PAP44C	PAP46C	PAP50C	PAP51C	PAP53C	SAP16C	SAP21C	SAP24C	SAP26C	SAP28C	SAP30C	SAP32C	SAP33C	SAP35C	SAP36C	SAP37C	SAP38C	SAP40C	SAP41C	SAP43C	SAP44C	SAP46C
	OTU18	Fusobacteria	Fusobacteria_c	Fusobacteriales	Fusobacteriaceae	Fusobacterium	Fusobacterium_nucleatum	99.5	Fusobacterium_nucleatum	100	Fusobacterium_nucleatum_subsp._vincentii	2	1675	145	1145	4716	2581	531	2346	3843	3995	659	4677	3410	2062	3292	1036	2423	1409	1035	2629	3176	34	3	430	2	417	55	133	598	530	5786	197	93	112	2	157	1802	4907
	OTU6	Firmicutes	Bacilli	Lactobacillales	Enterococcaceae	Enterococcus	Enterococcus_faecalis	100	Enterococcus_faecalis	100	Enterococcus_faecalis	1	0	1	1	0	1	5	0	0	0	0	0	2	2	1	1	0	0	0	0	0	0	0	0	2588	994	560	0	1	1	0	196	1774	11851	2470	7231	0	0
	OTU10	Firmicutes	Tissierellia	Tissierellales	Peptoniphilaceae	Parvimonas	Parvimonas_micra	100	Parvimonas_micra	100	Parvimonas_micra	1	1	2	3577	2	398	1649	519	1	4258	103	308	1669	387	1647	1337	1414	5210	152	2	1115	67	2041	0	3	43	1347	22	11	80	83	16	12	1119	0	1853	252	0
	OTU8	Bacteroidetes	Bacteroidia	Bacteroidales	Bacteroidaceae	Bacteroides	Phocaeicola_abscessus	100	Phocaeicola_abscessus	100	Bacteroidaceae_[G-1]_bacterium_HMT_272	1	1	5798	0	1890	412	147	90	0	0	414	2	1	57	150	270	109	48	1899	584	2141	2373	0	5	0	1	0	33	165	0	284	446	422	0	0	1	1754	0
	OTU7	Synergistetes	Synergistia	Synergistales	Jonquetella_f	Pyramidobacter	Pyramidobacter_piscolens	100	Pyramidobacter_piscolens	99.8	Pyramidobacter_piscolens	0	0	0	0	0	0	0	0	1	0	1	2	0	2481	115	4616	2	5	3819	7304	1	5239	2	0	0	2	1	2	44	1	0	1876	2014	0	1	2	2	0
	OTU11	Firmicutes	Clostridia	Clostridiales	Eubacteriaceae	Pseudoramibacter	Pseudoramibacter_alactolyticus	100	Pseudoramibacter_alactolyticus	100	Pseudoramibacter_alactolyticus	0	285	236	0	0	304	1777	71	0	0	270	0	3	71	1660	98	1433	45	582	1311	0	90	4	1	1	3	8591	348	262	0	0	28	89	82	1	974	143	2
	OTU14	Actinobacteria	Actinobacteria_c	Propionibacteriales	Propionibacteriaceae	Propionibacterium	Propionibacterium_acidifaciens	98.8	Propionibacterium_acidifaciens	98.8	Acidipropionibacterium_acidifaciens	0	2	37	2	0	1	4	4	0	0	8	1	14	1	0	0	1	21	2	0	7	1	5301	0	4	7921	23	3	0	5	386	3460	443	0	0	1	2	1707
	OTU33	Actinobacteria	Coriobacteriia	Coriobacteriales	Coriobacteriaceae	Atopobium	Atopobium_rimae	100	Atopobium_rimae	100	Atopobium_rimae	0	0	39	1870	0	129	494	836	0	1	1001	515	794	213	420	109	20	80	182	1	133	1232	0	0	1	1	541	22	0	52	2	74	162	44	1	0	1034	22
	OTU24	Bacteroidetes	Bacteroidia	Bacteroidales	Porphyromonadaceae	Porphyromonas	Porphyromonas_endodontalis	99.5	Porphyromonas_endodontalis	100	Porphyromonas_endodontalis	0	1285	0	949	0	1780	1014	2	1	1769	3	831	1528	471	0	0	1343	307	3	1	613	11	0	0	0	30	0	13	73	29	111	58	6	0	0	1	626	1
	OTU27	Bacteroidetes	Bacteroidia	Bacteroidales	Porphyromonadaceae	Porphyromonas	Porphyromonas_gingivalis	99.5	Porphyromonas_gingivalis	100	Porphyromonas_gingivalis	0	3025	8	1	1	22	0	0	0	1	14	11	0	0	0	0	0	3	1123	3	0	1	0	0	0	40	0	18	598	0	2305	388	63	0	0	69	1926	0
	OTU17	Synergistetes	Synergistia	Synergistales	Fretibacterium_f	Fretibacterium	Fretibacterium_fastidiosum	100	Fretibacterium_fastidiosum	99.8	Fretibacterium_fastidiosum	3244	462	90	0	1	1304	106	1	417	0	63	53	0	4	22	35	317	34	19	3	161	343	2	0	0	100	0	49	121	82	825	108	0	1	0	2	87	0
	OTU56	Synergistetes	Synergistia	Synergistales	Fretibacterium_f	Fretibacterium	GU430992_s	100	GU430992_s	99.5	Fretibacterium_sp._HMT_359	9	663	210	0	882	522	32	726	737	0	11	5	0	0	0	5	188	76	26	1	29	30	0	0	0	575	201	452	63	231	433	58	4	0	0	79	350	124
	OTU15	Firmicutes	Negativicutes	Veillonellales	Veillonellaceae	Dialister	Dialister_invisus	100	Dialister_invisus	100	Dialister_invisus	995	0	20	96	0	131	726	689	0	0	1016	770	702	337	574	285	316	44	0	14	223	570	2	216	1	1	6	1	52	209	0	10	10	19	1	58	954	368
	OTU12	Firmicutes	Clostridia	Clostridiales	Peptostreptococcaceae	Peptostreptococcus	JRNB_s	100	Peptostreptococcus_stomatis	100	Peptostreptococcus_stomatis	900	0	0	957	0	0	2242	133	0	2	31	1072	510	230	932	0	20	298	1	2	542	16	3	0	3005	0	48	0	0	137	0	52	186	4	0	24	239	10
	OTU48	Actinobacteria	Actinobacteria_c	Propionibacteriales	Propionibacteriaceae	Propionibacterium	Propionibacterium_propionicum	99.8	Propionibacterium_propionicum	99.8	Pseudopropionibacterium_propionicum	1	0	3	1	2	0	0	1	0	0	1	0	0	1	0	0	0	45	0	0	0	0	481	0	8378	2	2	1	0	1	0	1	0	0	0	0	81	2
	OTU23	Firmicutes	Bacilli	Lactobacillales	Streptococcaceae	Streptococcus	Streptococcus_constellatus	100	Streptococcus_constellatus	100	Streptococcus_constellatus	0	0	0	146	0	1	1	255	1	864	4	3	16	0	0	55	20	0	1	1	71	0	1	337	0	1	5	2	54	8	0	2	0	3	9577	2	40	344
	OTU44	Bacteroidetes	Bacteroidia	Bacteroidales	Prevotellaceae	Alloprevotella	Alloprevotella_tannerae	99.5	Alloprevotella_tannerae	99.5	Alloprevotella_tannerae	3463	0	0	29	0	3	15	2197	0	0	27	209	21	853	3	1002	323	17	1	0	305	43	0	0	0	1	0	1	90	636	0	0	0	0	0	11	5	1
	OTU28	Firmicutes	Negativicutes	Veillonellales	Veillonellaceae	Veillonella	Veillonella_unclassified	100	Veillonella_parvula	99.8	Veillonella_parvula	0	0	3	15	0	0	21	65	0	0	11	24	91	9	0	0	2	12	0	1	1	0	0	1	0	0	0	0	0	2	0	0	0	0	0	2	2	1
	OTU29	Actinobacteria	Coriobacteriia	Coriobacteriales	Coriobacteriaceae	Olsenella	Olsenella_profusa	100	Olsenella_profusa	100	Olsenella_profusa	19	0	65	3	1	3	122	0	0	0	861	749	11	0	4	1	6	21	247	22	56	76	17	1	0	0	515	144	937	3435	0	135	53	0	0	0	2	21
	OTU26	Bacteroidetes	Bacteroidia	Bacteroidales	Porphyromonadaceae	Tannerella	Tannerella_forsythia	100	Tannerella_forsythia	100	Tannerella_forsythia	0	635	783	0	566	153	28	1313	1	4	1	2	0	0	0	20	0	1	0	0	386	4	0	0	1	457	3	286	23	521	317	125	104	0	0	0	22	1
	OTU22	Firmicutes	Clostridia	Clostridiales	Mogibacterium_f	Mogibacterium	Mogibacterium_timidum	100	Mogibacterium_timidum	100	Mogibacterium_timidum	2	645	305	227	313	68	268	84	29	0	39	183	0	71	302	333	374	217	706	14	188	160	0	1	0	7	643	458	54	918	366	74	53	14	0	21	122	19
	OTU34	Bacteroidetes	Bacteroidia	Bacteroidales	Porphyromonadaceae	ADCM_g	ADCM_s	100	ADCM_s	99.8	Bacteroidales_[G-2]_bacterium_HMT_274	0	10	0	0	1658	0	1	1	0	1	2	1	0	0	0	0	0	9	0	0	91	0	0	0	0	127	3	0	0	272	58	1	15	15	0	11	0	0
	OTU91	Spirochaetes	Spirochaetes_c	Spirochaetales	Spirochaetaceae	Treponema	Treponema_socranskii	99.5	Treponema_socranskii	100	Treponema_socranskii	2	156	13	1	62	180	4	157	388	13	26	47	0	90	41	64	162	145	2	2	253	28	0	0	0	163	15	650	841	84	160	73	4	0	0	14	113	95
	OTU35	Firmicutes	Clostridia	Clostridiales	Lachnospiraceae	Moryella	FJ983002_s	99.3	FJ983002_s	99.8	Stomatobaculum_sp._HMT_373	0	0	9	0	786	1182	0	0	0	0	840	1	0	868	0	155	319	86	127	0	0	520	1	0	0	2	0	306	22	1	0	74	10	0	0	36	0	0
	OTU96	Bacteroidetes	Bacteroidia	Bacteroidales	Prevotellaceae	Prevotella	Prevotella_oris	99.3	Prevotella_oris	99.1	Prevotella_oris	0	0	0	301	0	6	23	0	219	0	9	906	120	2535	956	447	51	91	1	2	66	0	0	0	0	0	2	1	3	25	0	11	2	0	0	14	22	1265
	OTU203	Actinobacteria	Actinobacteria_c	Actinomycetales	Actinomycetaceae	Actinomyces	Actinomyces_unclassified	98.6	Actinomyces_israelii	99.1	Actinomyces_israelii	0	137	1	0	0	0	0	0	0	0	1	0	0	0	0	0	1	3	1	0	0	0	1	0	0	13	0	7	592	0	52	3	8	0	264	88	0	0
	OTU533	Proteobacteria	Epsilonproteobacteria	Campylobacterales	Campylobacteraceae	Campylobacter	Campylobacter_gracilis	99.5	Campylobacter_gracilis	99.5	Campylobacter_gracilis	0	12	6	0	0	0	1	204	0	0	1	4	0	480	0	50	664	23	0	0	227	0	0	0	0	0	2	0	259	0	0	0	4	49	0	42	4	789
	OTU25	Actinobacteria	Coriobacteriia	Coriobacteriales	Coriobacteriaceae	Olsenella	Olsenella_uli	100	Olsenella_uli	100	Olsenella_uli	371	91	103	32	0	431	135	21	0	0	17	15	0	12	490	224	241	6	274	23	158	271	0	0	0	3	256	11	138	226	0	49	73	0	1	317	112	79
	OTU101	Firmicutes	Negativicutes	Selenomonadales	Selenomonadaceae	Schwartzia	AF287791_s	99.5	AF287791_s	99.5	Veillonellaceae_[G-1]_bacterium_HMT_150	1	0	18	3	21	17	12	374	1148	0	346	0	2	72	18	86	71	4	115	1	301	110	1	0	0	1316	0	5	68	912	0	8	0	0	0	0	170	0
	OTU31	Spirochaetes	Spirochaetes_c	Spirochaetales	Spirochaetaceae	Treponema	Treponema_denticola	99.5	Treponema_denticola	100	Treponema_denticola	0	6	0	0	975	376	22	0	1500	0	10	2	0	60	0	130	0	53	0	1	0	8	0	0	0	147	0	13	109	141	167	21	4	0	0	24	598	0
	OTU30	Proteobacteria	Epsilonproteobacteria	Campylobacterales	Campylobacteraceae	Campylobacter	Campylobacter_rectus	100	Campylobacter_showae Campylobacter_rectus	100	Campylobacter_rectus	0	380	0	1	311	2	18	0	703	103	0	4	46	0	1	4	59	12	0	0	25	0	0	0	0	30	0	110	114	0	292	8	7	0	0	0	4	2
	OTU40	Firmicutes	Clostridia	Clostridiales	Mogibacterium_f	Aminicella	Eubacterium_nodatum	100	Eubacterium_nodatum	99.5	Peptostreptococcaceae_[XI][G-6]_nodatum	0	860	292	0	348	8	260	111	0	5	44	0	0	0	0	112	184	84	108	15	295	208	1	1	0	0	0	123	81	560	130	21	53	1	1	1	135	0
	OTU118	Actinobacteria	Actinobacteria_c	Actinomycetales	Actinomycetaceae	Actinomyces	Actinomyces_unclassified	99.8	Actinomyces_naeslundii	99.8	Actinomyces_naeslundii	0	1	1	11	0	0	1	0	0	0	8	2	2	0	0	0	0	2	0	0	1	1	8	333	0	133	17	4	70	1	0	0	0	24	0	0	10	0
	OTU87	Firmicutes	Tissierellia	Tissierellales	Tissierellales_unclassified	Tissierellales_unclassified	Tissierellales_unclassified	93.8	EU289122_s	91	Peptoniphilus_sp._HMT_375	0	0	0	0	0	0	0	0	0	0	0	0	0	0	0	0	0	1	6	1	0	6	0	0	0	12	2	59	0	0	151	0	0	0	0	0	0	0
	OTU47	Actinobacteria	Coriobacteriia	Coriobacteriales	Coriobacteriaceae	Slackia	Slackia_exigua	98.8	Slackia_exigua	99.5	Slackia_exigua	1	0	1	658	355	86	262	77	0	66	3	246	57	1	151	20	33	16	6	1	25	0	0	0	0	0	176	0	46	45	229	2034	0	0	0	0	80	237
	OTU1192	Firmicutes	Negativicutes	Selenomonadales	Selenomonadaceae	Schwartzia	GU470897_s	95.8	GU470897_s	99.3	Veillonellaceae_[G-1]_bacterium_HMT_145	0	0	0	0	0	0	0	3	0	0	0	1	0	0	0	23	9	6	4	1	44	6	0	0	0	110	0	5330	0	1	0	0	0	0	0	0	0	1
	OTU135	Actinobacteria	Actinobacteria_c	Actinomycetales	Actinomycetaceae	Actinomyces	FM873673_s	99.3	FM873673_s	99.5	Actinomyces_sp._HMT_525	0	0	0	0	0	0	0	0	0	0	5	0	0	0	0	0	0	0	0	0	0	0	0	0	0	42	0	0	997	1	0	0	2	0	2	1	19	0
	OTU94	Firmicutes	Clostridia	Clostridiales	Lachnospiraceae	Shuttleworthia	Shuttleworthia_satelles	99.5	Shuttleworthia_satelles	99.8	Shuttleworthia_satelles	0	0	0	61	0	1	92	0	0	0	0	14	1	20	9	3	4	0	0	0	11	0	0	2	0	0	213	0	0	1	0	3	19	0	0	0	9	49
	OTU82	Bacteroidetes	Bacteroidia	Bacteroidales	Porphyromonadaceae	AM420159_g	FM873521_s	99.5	FM873521_s	100	Bacteroidetes_[G-5]_bacterium_HMT_511	0	0	2	0	0	0	3	0	2134	0	0	0	0	0	0	1	0	2576	0	0	0	0	1	0	0	121	0	0	6	91	0	0	0	0	0	39	0	0
	OTU49	Firmicutes	Clostridia	Clostridiales	Lachnospiraceae	Oribacterium	ACIQ_s	100	ACIQ_s	100	Oribacterium_sp._HMT_078	1087	0	4	103	0	3	91	20	0	0	13	267	0	17	191	176	0	11	0	0	13	33	0	0	0	0	0	1	42	24	0	3	1	0	0	1	79	1574
	OTU89	Firmicutes	Negativicutes	Veillonellales	Veillonellaceae	Megasphaera	Anaeroglobus_geminatus	99.5	Anaeroglobus_geminatus	100	Anaeroglobus_geminatus	0	0	3	101	0	1136	23	1	6	0	581	6	1	37	2	2	141	6	0	1	24	0	0	3	0	0	0	0	150	1	218	11	17	13	0	48	4	504
	OTU42	Firmicutes	Clostridia	Clostridiales	Peptostreptococcaceae	Filifactor	Filifactor_alocis	100	Filifactor_alocis	100	Filifactor_alocis	0	1169	2	0	0	393	312	0	0	0	35	0	11	124	551	0	0	274	3	2	35	219	1	0	0	1	1	2	11	0	0	32	1	0	0	0	0	0
	OTU105	Actinobacteria	Actinobacteria_c	Micrococcales	Micrococcaceae	Micrococcus	Micrococcus_endophyticus	100	Micrococcus_aloeverae	99.8	Micrococcus_luteus	0	0	0	0	0	0	1	0	0	0	0	0	0	0	0	0	0	0	0	0	0	0	0	5276	0	0	5	0	0	0	0	3	0	0	0	0	0	0
	OTU154	Firmicutes	Negativicutes	Selenomonadales	Selenomonadaceae	Selenomonas	Selenomonas_sputigena	98.4	Selenomonas_sputigena	99.8	Selenomonas_sp._HMT_134	98	23	0	105	0	0	18	0	74	0	4	534	35	0	16	185	421	4	0	0	29	0	0	0	0	15	0	278	281	2	0	2	2	1	1	0	213	184
	OTU62	Proteobacteria	Deltaproteobacteria	Desulfobulbaceae_o	Desulfobulbaceae	Desulfobulbus	APKC_s	100	APKC_s	99.8	Desulfobulbus_sp._HMT_041	0	145	166	1	351	87	25	0	0	0	5	3	0	0	0	0	5	2	0	0	37	375	0	0	0	522	0	46	16	2	302	51	2	0	0	0	274	1
	OTU58	Chloroflexi	Anaerolineae	Anaerolinaeles	Anaerolinaceae	Flexilinea	APVJ_s	100	APVJ_s	100	Anaerolineae_[G-1]_bacterium_HMT_439	0	562	460	0	389	3	0	515	0	0	0	2	0	0	0	0	19	0	365	0	91	0	0	0	0	22	0	0	80	4	0	11	0	0	0	0	0	0
	OTU21	Actinobacteria	Coriobacteriia	Coriobacteriales	Coriobacteriaceae	Cryptobacterium	Cryptobacterium_curtum	100	Cryptobacterium_curtum	100	Cryptobacterium_curtum	20	0	0	0	0	0	10	0	69	0	2	0	45	0	0	0	0	0	0	0	0	0	0	0	0	0	0	0	0	0	0	1	4	0	0	4	0	92
	OTU57	Firmicutes	Negativicutes	Veillonellales	Veillonellaceae	Dialister	Dialister_pneumosintes	99.8	Dialister_pneumosintes	99.8	Dialister_pneumosintes	0	0	2	535	0	176	93	0	0	231	17	141	0	1070	235	302	176	50	64	0	64	11	0	0	0	1	1	30	51	12	0	1	9	0	0	0	443	0
	OTU67	Firmicutes	Negativicutes	Selenomonadales	Selenomonadaceae	Selenomonas	Selenomonas_noxia	99.8	Selenomonas_noxia	99.8	Selenomonas_noxia	0	0	0	6	0	0	5	0	0	0	3	3	2	5	0	0	2	15	0	0	0	1	2296	0	0	0	0	0	21	0	0	1	0	0	0	30	0	0
	OTU83	Actinobacteria	Coriobacteriia	Coriobacteriales	Coriobacteriaceae	Olsenella	Olsenella_scatoligenes	98.8	Olsenella_scatoligenes	95.1	Olsenella_uli	0	0	26	0	0	0	1	0	0	0	0	0	0	0	0	0	4	0	55	42	0	81	0	1408	0	0	454	0	0	0	0	215	307	0	0	0	15	15
	OTU108	Proteobacteria	Deltaproteobacteria	Desulfovibrionales	Desulfomicrobiaceae	Desulfomicrobium	Desulfomicrobium_orale	100	Desulfomicrobium_orale	100	Desulfomicrobium_orale	0	0	0	0	0	0	1	0	0	0	0	0	1	0	0	0	1	0	0	0	0	0	0	0	0	0	0	0	110	0	0	0	0	0	0	0	0	0
	OTU71	Firmicutes	Clostridia	Clostridiales	Mogibacterium_f	Eubacterium_g10	Eubacterium_g10_unclassified	100	Eubacterium_infirmum	100	Peptostreptococcaceae_[XI][G-1]_infirmum	4	0	0	14	24	6	316	820	0	0	414	247	2	33	108	75	2	29	0	0	30	4	1	0	0	0	38	0	0	12	0	45	39	0	0	1	50	672
	OTU77	Saccharibacteria_TM7	Saccharimonas_c	Saccharimonas_o	Saccharimonas_f	Saccharimonas	AM420132_s	98.5	AM420132_s	100	Saccharibacteria_(TM7)_[G-1]_bacterium_HMT_346	0	0	1	0	0	0	3	0	0	0	0	6	1	0	0	0	18	9	0	0	0	0	0	0	0	0	0	0	1072	0	0	0	0	1	0	722	1	0
	OTU115	Firmicutes	Negativicutes	Selenomonadales	Selenomonadaceae	Schwartzia	GU470897_s	99.5	GU470897_s	99.1	Veillonellaceae_[G-1]_bacterium_HMT_135	0	0	6	0	0	0	3	37	10	0	102	2	0	1	2	24	34	14	61	0	42	28	0	0	0	68	0	2534	140	2	0	0	0	0	1	0	2	0
	OTU824	Proteobacteria	Betaproteobacteria	Burkholderiales	Oxalobacteraceae	Noviherbaspirillum	Noviherbaspirillum_suwonense	99.5	Noviherbaspirillum_suwonense	94.4	Ralstonia_sp._HMT_406	0	0	0	0	0	0	0	0	0	0	0	0	0	0	0	0	0	0	0	0	1	0	0	0	0	0	0	0	0	0	108	0	0	0	0	0	0	0
	OTU51	Tenericutes	Mollicutes	Mycoplasmatales	Mycoplasmataceae	Mycoplasma_g4	Mycoplasma_salivarium	100	Mycoplasma_salivarium	100	Mycoplasma_salivarium	0	0	0	0	0	0	0	1	0	0	0	0	0	9	0	484	0	0	0	0	109	0	0	0	0	22	0	0	0	67	0	449	2577	0	0	0	26	0
	OTU110	Bacteroidetes	Bacteroidia	Bacteroidales	Prevotellaceae	Prevotella	Prevotella_baroniae	100	Prevotella_baroniae	99.8	Prevotella_baroniae	0	0	4	18	0	213	51	192	228	0	1045	7	0	24	0	1	89	1	1	9	0	0	0	0	0	0	0	2	0	0	0	4	0	0	0	0	1	0
	OTU38	Proteobacteria	Gammaproteobacteria	Pasteurellales	Pasteurellaceae	Aggregatibacter	Aggregatibacter_aphrophilus	100	Aggregatibacter_aphrophilus	100	Aggregatibacter_aphrophilus	0	0	0	1	0	0	0	0	0	0	2	0	0	0	1	0	0	8	0	0	1	0	3698	0	0	0	0	0	0	0	0	0	0	0	0	1	0	0
	OTU98	Firmicutes	Clostridia	Clostridiales	Peptostreptococcaceae	Eubacterium_g15	Eubacterium_yurii	100	Eubacterium_yurii	100	Peptostreptococcaceae_[XI][G-7]_yurii_subspp._yurii_&_margaretiae	1613	0	0	0	1	0	0	86	1	0	0	0	115	0	0	0	0	4	0	0	0	0	0	0	0	0	0	0	0	0	0	7	13	1	0	0	0	0
	OTU189	Actinobacteria	Actinobacteria_c	Actinomycetales	Actinomycetaceae	Actinomyces	Actinomyces_meyeri	100	Actinomyces_meyeri	100	Actinomyces_meyeri	3	916	0	18	0	0	102	0	0	0	2	1	21	5	1	0	1	14	0	0	313	0	0	484	0	0	0	0	2	0	0	5	0	463	0	0	47	0
	OTU254	Bacteroidetes	Flavobacteria	Flavobacteriales	Flavobacteriaceae	Capnocytophaga	Capnocytophaga_ochracea	99.1	GU561335_s JQ473872_s Capnocytophaga_ochracea	100	Capnocytophaga_sp._HMT_336	0	0	0	0	0	0	0	0	0	0	0	2	0	0	0	0	0	3	0	0	0	0	1	0	0	0	0	0	89	0	0	0	0	0	0	11	0	1
	OTU59	Firmicutes	Erysipelotrichi	Erysipelotrichales	Erysipelotrichaceae	Bulleidia	Solobacterium_moorei	99.8	Solobacterium_moorei	100	Solobacterium_moorei	458	1	0	132	0	37	537	198	2	0	41	53	0	48	393	96	0	7	1	1	26	2	0	0	0	0	117	0	0	8	0	0	0	1	1	20	61	255
	OTU225	Spirochaetes	Spirochaetes_c	Spirochaetales	Spirochaetaceae	Treponema	Treponema_maltophilum	99.5	Treponema_maltophilum	99.1	Treponema_maltophilum	0	0	7	0	181	143	17	0	620	0	3	27	0	2	1	8	46	11	40	3	0	19	0	1	0	90	0	341	30	38	122	36	0	0	1	2	29	0
	OTU139	Actinobacteria	Actinobacteria_c	Actinomycetales	Actinomycetaceae	Actinomyces	Actinomyces_gerencseriae	98.6	Actinomyces_gerencseriae	99.8	Actinomyces_gerencseriae	0	0	0	1	0	0	0	0	0	0	0	0	16	0	45	0	0	7	0	0	1	0	46	0	0	0	0	0	7	0	0	0	0	0	55	0	2	0
	OTU200	Actinobacteria	Actinobacteria_c	Actinomycetales	Actinomycetaceae	Actinomyces	Actinomyces_dentalis	99.8	Actinomyces_dentalis	99.8	Actinomyces_dentalis	0	7	1	0	0	0	0	0	0	0	5	4	0	0	0	0	0	29	0	0	0	0	1	0	0	0	0	0	805	0	0	0	0	0	0	1	0	0
	OTU168	Bacteroidetes	Flavobacteria	Flavobacteriales	Flavobacteriaceae	Capnocytophaga	Capnocytophaga_sputigena	100	Capnocytophaga_sputigena	100	Capnocytophaga_sputigena	0	0	0	0	0	0	1	0	0	0	1	0	0	0	0	0	0	3	0	0	1	0	0	0	0	0	0	0	14	0	0	0	0	0	0	0	0	0
	OTU181	Bacteroidetes	Flavobacteria	Flavobacteriales	Flavobacteriaceae	Capnocytophaga	Capnocytophaga_unclassified	99.1	Capnocytophaga_granulosa Capnocytophaga_gingivalis	99.3	Capnocytophaga_gingivalis	0	0	0	0	0	0	2	0	0	0	1	0	0	0	0	0	0	6	0	0	0	0	0	0	0	0	0	0	129	0	0	0	0	0	0	0	0	0
	OTU114	Firmicutes	Clostridia	Clostridiales	Lachnospiraceae	Oribacterium	GQ422713_s	100	GQ422713_s	100	Oribacterium_sp._HMT_102	0	0	61	0	0	103	331	0	0	0	347	18	0	71	260	600	142	102	6	0	0	62	0	0	0	0	0	9	0	0	0	0	0	0	0	0	0	0
	OTU144	Spirochaetes	Spirochaetes_c	Spirochaetales	Spirochaetaceae	Treponema	Treponema_unclassified	99.3	Treponema_medium Treponema_vincentii	100	Treponema_sp._HMT_231	0	74	3	0	0	31	4	0	234	0	3	4	1	279	0	10	386	15	0	0	438	3	0	0	0	14	0	7	49	0	0	7	0	0	0	17	19	0
	OTU75	Firmicutes	Bacilli	Bacillales	Gemella_f	Gemella	Gemella_unclassified	99.8	Gemella_morbillorum	99.8	Gemella_morbillorum	1	0	0	0	0	0	116	0	0	0	1	1	53	0	0	0	0	0	0	0	1	0	0	0	0	0	0	0	0	0	0	767	1595	1	0	79	0	0
	OTU64	Bacteroidetes	Bacteroidia	Bacteroidales	Prevotellaceae	Prevotella	Prevotella_nigrescens	99.8	Prevotella_nigrescens	100	Prevotella_nigrescens	0	0	0	38	0	0	316	98	86	0	20	1019	3	229	463	0	131	2	0	0	82	0	0	0	0	0	0	0	0	25	0	0	4	0	0	0	0	0
	OTU210	Bacteroidetes	Bacteroidia	Bacteroidales	Prevotellaceae	Prevotella	Prevotella_denticola	100	Prevotella_denticola	99.8	Prevotella_denticola	92	0	0	757	0	47	139	0	0	0	0	329	88	0	415	0	2	1	0	0	3	0	0	126	0	0	0	0	68	1	0	0	0	0	0	3	0	118
	OTU159	Firmicutes	Bacilli	Lactobacillales	Lactobacillaceae	Lactobacillus	Lactobacillus_paracasei	100	Lactobacillus_zeae Lactobacillus_casei Lactobacillus_paracasei	100	Lactobacillus_paracasei	0	0	0	373	0	0	21	0	0	0	0	0	2589	0	0	0	0	0	0	0	0	0	0	1	0	0	0	0	0	0	0	0	0	1	0	1	0	1
	OTU84	Firmicutes	Erysipelotrichi	Erysipelotrichales	Erysipelotrichaceae	Eggerthia	Eggerthia_catenaformis	100	Eggerthia_catenaformis	99.8	Eggerthia_catenaformis	0	0	2	0	0	77	254	0	0	0	381	1	0	26	24	105	0	3	1	0	0	0	0	0	0	0	0	0	8	0	0	0	6	0	0	0	0	0
	OTU123	Firmicutes	Clostridia	Clostridiales	Mogibacterium_f	Eubacterium_g11	Eubacterium_brachy	100	Eubacterium_brachy	100	Peptostreptococcaceae_[XI][G-9]_brachy	0	0	0	1	0	0	1	0	0	1537	1	0	4	0	0	4	332	1	43	0	0	0	2	0	0	10	5	0	18	98	57	14	0	0	0	1	9	0
	OTU504	Actinobacteria	Coriobacteriia	Coriobacteriales	Coriobacteriaceae	Atopobium	AY278623_s	99.5	AY278623_s	99.5	Atopobium_sp._HMT_416	0	0	0	0	0	0	574	0	0	0	13	38	1	30	0	11	8	4	1	356	7	0	0	218	0	0	0	4	0	15	142	4	64	0	0	0	0	0
	OTU164	Bacteroidetes	Bacteroidia	Bacteroidales	Prevotellaceae	Prevotella	Prevotella_intermedia	98.8	Prevotella_intermedia	99.5	Prevotella_intermedia	1	31	1	0	2	419	0	0	0	0	0	0	0	0	0	34	5	0	0	0	0	1	0	0	0	2	0	0	2	0	0	0	0	0	0	3	860	0
	OTU120	Firmicutes	Tissierellia	Tissierellales	Peptoniphilaceae	KI259813_g	KI259813_s	100	KI259813_s	100	Peptoniphilaceae_[G-1]_bacterium_HMT_113	1	164	0	0	0	0	0	233	0	0	1	1	0	0	0	0	0	0	0	0	0	2	0	1	0	142	0	0	0	0	175	0	0	0	0	0	0	0
	OTU50	Actinobacteria	Coriobacteriia	Coriobacteriales	Coriobacteriaceae	Coriobacteriaceae_unclassified	Coriobacteriaceae_unclassified	93.8	Denitrobacterium_detoxificans			0	0	0	1	0	0	0	0	0	0	1	0	0	0	0	1	0	0	87	135	0	0	0	0	0	1	0	45	0	0	0	0	0	0	0	0	0	0
	OTU72	Spirochaetes	Spirochaetes_c	Spirochaetales	Spirochaetaceae	Sphaerochaeta	GQ138632_s	93.2	GQ138632_s			0	0	2814	0	0	0	0	0	0	0	0	1	0	0	0	1	0	0	0	0	0	1	0	0	2	0	0	6	0	0	0	0	0	0	0	0	0	0
	OTU79	Firmicutes	Clostridia	Clostridiales	Mogibacterium_f	FJ983019_g	FJ983019_s	100	FJ983019_s	99.8	Peptostreptococcaceae_[XI][G-1]_bacterium_HMT_383	0	0	1765	0	0	0	0	0	1	0	0	0	0	0	0	0	42	106	501	18	0	43	1	0	0	3	0	2	38	0	0	145	0	0	0	0	0	0
	OTU99	Saccharibacteria_TM7	Saccharimonas_c	Saccharimonas_o	Saccharimonas_f	AF125206_g	AF125206_s	99.5	AF125206_s	100	Saccharibacteria_(TM7)_[G-5]_bacterium_HMT_356	0	0	0	0	0	0	0	0	0	0	1	1	2	0	0	0	0	43	0	0	3	0	0	0	0	0	0	1	204	11	0	17	159	0	0	0	0	0
	OTU103	Firmicutes	Clostridia	Clostridiales	Mogibacterium_f	AF481212_g	AF481212_s	100	AF481212_s	100	Peptostreptococcaceae_[XI][G-4]_bacterium_HMT_369	139	0	0	27	0	57	58	107	35	32	2	6	0	1	0	0	51	15	0	0	39	0	0	0	0	1	0	27	9	21	69	3	28	0	0	0	13	0
	OTU129	Bacteroidetes	Bacteroidia	Bacteroidales	Prevotellaceae	Prevotella	AF481226_s	99.8	AF481226_s	99.8	Prevotella_sp._HMT_376	0	0	10	0	0	0	66	0	29	0	1247	0	0	0	22	0	32	0	0	0	0	0	0	0	0	0	0	7	2	0	0	0	0	0	0	0	36	0
	OTU507	Fusobacteria	Fusobacteria_c	Fusobacteriales	Leptotrichiaceae	Leptotrichia	Leptotrichia_shahii	99.8	Leptotrichia_shahii	99.5	Leptotrichia_shahii	0	0	0	0	0	0	16	0	0	0	0	0	0	0	0	0	0	6	0	0	0	0	0	0	0	0	0	0	182	0	0	0	0	0	0	1	0	0
	OTU149	Firmicutes	Clostridia	Clostridiales	Lachnospiraceae	Catonella	Catonella_morbi	100	Catonella_morbi	100	Catonella_morbi	180	0	0	30	0	101	0	39	0	0	0	57	10	43	74	0	11	29	0	0	45	1	0	1	0	0	0	0	18	1	0	0	0	0	0	65	6	33
	OTU1427	Firmicutes	Negativicutes	Selenomonadales	Selenomonadaceae	Selenomonas	Selenomonas_sputigena	98.1	Selenomonas_sputigena	98.1	Selenomonas_sputigena	0	0	0	40	0	0	4	0	67	0	1	159	43	0	3	141	35	8	0	0	2	1	0	0	0	3	0	5	317	1	0	0	0	8	1	0	62	83
	OTU90	Proteobacteria	Gammaproteobacteria	Enterobacteriales	Enterobacteriaceae	Klebsiella	Klebsiella_pneumoniae	99.8	Klebsiella_pneumoniae	99.8	Klebsiella_pneumoniae	0	2	0	1	0	0	0	0	4	15	0	0	0	0	0	0	0	0	1	0	0	4	0	365	0	0	0	0	0	1695	0	0	0	0	1	0	0	0
	OTU935	Firmicutes	Clostridia	Clostridiales	Lachnospiraceae	Oribacterium	AM420101_s	99.8	AM420101_s	96.8	Oribacterium_sp._HMT_078	2	0	4	1	0	0	0	0	0	0	1579	3	0	1	3	4	48	7	0	3	1	0	0	0	0	1	0	45	0	0	0	0	0	0	0	0	3	6
	OTU92	Bacteroidetes	Bacteroidia	Bacteroidales	Bacteroidaceae	Bacteroides	Bacteroides_thetaiotaomicron	100	Bacteroides_thetaiotaomicron	90.8	Bacteroides_pyogenes	1	0	0	0	0	1	0	0	0	0	0	0	0	0	0	0	0	0	0	0	0	0	0	0	0	0	1	0	0	0	0	523	1536	0	0	0	0	0
	OTU136	Firmicutes	Erysipelotrichi	Erysipelotrichales	Erysipelotrichaceae	Bulleidia	FJ976219_s	98.6	FJ976219_s	100	Erysipelotrichaceae_[G-1]_bacterium_HMT_904	0	0	7	3	0	130	17	0	0	0	54	1	0	135	115	3	42	100	0	0	65	457	0	0	0	0	1	2	0	141	0	30	24	0	0	0	0	0
	OTU213	Firmicutes	Bacilli	Lactobacillales	Lactobacillaceae	Lactobacillus	Lactobacillus_johnsonii	99.8	Lactobacillus_gasseri	99.8	Lactobacillus_gasseri	0	0	0	288	0	0	0	0	0	0	0	2	1698	0	0	1	0	0	0	0	0	0	0	0	0	0	0	0	0	0	0	0	0	0	0	0	0	0
	OTU204	Proteobacteria	Betaproteobacteria	Neisseriales	Neisseriaceae	Neisseria	Neisseria_unclassified	99.5	Neisseria_subflava	99.3	Neisseria_flava	0	0	1	0	0	1	0	0	0	0	0	0	0	0	0	0	0	0	0	0	1	0	0	337	0	0	0	0	0	0	0	0	0	0	0	92	0	0
	OTU146	Firmicutes	Bacilli	Lactobacillales	Streptococcaceae	Streptococcus	Streptococcus_mutans	100	Streptococcus_mutans	100	Streptococcus_mutans	0	0	10	0	0	0	0	0	0	0	0	0	0	0	0	0	0	0	0	0	0	0	0	0	0	0	0	0	0	7	0	0	0	58	0	13	0	2
	OTU178	Actinobacteria	Coriobacteriia	Coriobacteriales	Coriobacteriaceae	Coriobacteriaceae_unclassified	Coriobacteriaceae_unclassified	95.3	DQ807451_s	92.5	Eggerthella_lenta	0	41	165	0	0	0	0	0	64	0	0	0	0	0	0	0	2	0	124	474	0	127	1	0	0	1	0	1	0	0	0	748	0	0	1	114	0	0
	OTU191	Saccharibacteria_TM7	Saccharimonas_c	Saccharimonas_o	Saccharimonas_f	Saccharimonas	CP007496_s	99.5	CP007496_s	99.5	Saccharibacteria_(TM7)_[G-1]_bacterium_HMT_952	0	0	0	0	0	0	0	0	0	0	2	4	0	0	0	0	0	22	0	1	0	0	0	0	0	1	0	0	0	0	0	19	5	0	0	371	0	0
	OTU811	Actinobacteria	Coriobacteriia	Coriobacteriales	Coriobacteriaceae	Olsenella	KE952969_s	99.8	KE952969_s	99.8	Atopobium_sp._HMT_810	0	0	1	0	0	0	0	0	0	0	550	0	0	0	0	9	0	0	0	11	0	38	0	0	0	0	1	0	8	0	0	0	0	0	0	0	0	0
	OTU303	Deinococcus-Thermus	Deinococci	Deinococcales	Deinococcaceae	Deinococcus	Deinococcus_unclassified	94.7	DQ532194_s			0	0	0	0	0	0	0	0	0	0	0	0	0	0	0	0	0	0	0	0	0	0	0	0	0	0	0	0	0	0	0	0	0	0	0	0	0	0
	OTU205	Fusobacteria	Fusobacteria_c	Fusobacteriales	Leptotrichiaceae	Leptotrichia	AY349387_s	99.8	AY349387_s	99.8	Leptotrichia_sp._HMT_498	0	0	0	0	0	0	0	0	0	0	0	4	0	0	0	0	0	47	0	0	0	0	0	0	0	0	0	0	513	0	0	0	0	0	0	0	0	0
	OTU119	Spirochaetes	Spirochaetes_c	Spirochaetales	Spirochaetaceae	Treponema	Treponema_lecithinolyticum	100	Treponema_lecithinolyticum	99.8	Treponema_lecithinolyticum	0	0	0	0	1	0	0	0	962	0	0	0	3	1	0	0	1	0	0	0	0	1	0	0	0	36	0	0	27	1	0	0	0	0	0	14	0	0
	OTU270	Firmicutes	Clostridia	Clostridiales	Peptococcaceae	GQ422727_g	GQ422727_g_unclassified	98.1	GQ422727_s	99.5	Peptococcus_sp._HMT_168	354	0	0	0	0	30	0	14	0	0	0	29	0	0	0	0	78	0	0	0	0	0	1	0	0	0	0	0	0	0	0	0	1	0	0	1	0	0
	OTU186	Actinobacteria	Actinobacteria_c	Actinomycetales	Actinomycetaceae	Actinomyces	GU227170_s	99	GU227170_s	99.8	Actinomyces_sp._HMT_897	0	0	0	0	0	0	1	0	0	0	0	0	0	0	0	0	0	0	0	0	0	0	0	0	0	0	0	0	704	0	0	0	0	0	0	121	0	0
	OTU1941	Spirochaetes	Spirochaetes_c	Spirochaetales	Spirochaetaceae	Treponema	Treponema_unclassified	96.5	Treponema_denticola AF023032_s	99.1	Treponema_denticola	0	172	12	0	2	0	0	0	0	0	2	2	1	0	0	0	0	0	0	0	0	0	0	0	0	3	0	0	0	0	0	0	1	0	0	0	0	0
	OTU124	Actinobacteria	Actinobacteria_c	Actinomycetales	Actinomycetaceae	Actinomyces	Actinomyces_unclassified	96.7	Actinomyces_naturae	93.1	Actinomyces_timonensis	0	1	0	0	0	0	0	0	0	0	0	0	0	0	0	0	0	0	0	0	0	0	0	0	1	0	0	0	0	1570	0	0	0	0	0	0	0	0
	OTU137	Bacteroidetes	Bacteroidia	Bacteroidales	Odoribacteraceae	Odoribacter	Odoribacter_denticanis	98.1	Odoribacter_denticanis	99.8	Bacteroidetes_[G-6]_bacterium_HMT_516	0	0	0	0	0	0	0	1062	0	0	0	0	0	0	0	0	0	41	0	0	0	0	0	0	0	0	0	443	0	0	0	1	0	0	0	0	0	0
	OTU143	Proteobacteria	Gammaproteobacteria	Pasteurellales	Pasteurellaceae	Aggregatibacter	Aggregatibacter_actinomycetemcomitans	100	Aggregatibacter_actinomycetemcomitans	100	Aggregatibacter_actinomycetemcomitans	0	0	0	0	0	0	0	0	0	0	0	0	0	0	0	0	0	0	0	0	1549	0	0	0	0	0	0	0	0	0	0	0	0	0	0	0	0	0
	OTU277	Firmicutes	Clostridia	Clostridiales	Lachnospiraceae	Lachnoanaerobaculum	Lachnoanaerobaculum_unclassified	100	Lachnoanaerobaculum_saburreum	100	Lachnoanaerobaculum_saburreum	5	0	0	0	0	0	3	0	0	0	0	10	38	0	0	0	0	18	0	0	0	0	0	0	0	0	0	0	107	0	0	0	0	0	0	0	0	11
	OTU128	Firmicutes	Tissierellia	Tissierellales	Peptoniphilaceae	Peptoniphilus	Peptoniphilus_gorbachii	100	Peptoniphilus_gorbachii Peptoniphilus_rhinitidis	100	Peptoniphilus_sp._HMT_187	0	0	1	0	0	0	0	0	0	0	0	0	0	0	0	0	0	0	0	0	0	1	0	0	0	0	0	0	0	0	0	0	1	0	1528	0	0	0
	OTU152	Proteobacteria	Deltaproteobacteria	Desulfovibrionales	Desulfovibrionaceae	Desulfovibrio	JN713235_s	99.3	JN713235_s	96.5	Desulfovibrio_sp._HMT_040	0	0	0	0	0	0	0	0	0	0	0	0	0	0	0	1	0	13	0	0	0	0	0	0	0	0	0	1190	1	0	246	35	12	0	0	0	0	0
	OTU202	Fusobacteria	Fusobacteria_c	Fusobacteriales	Leptotrichiaceae	Leptotrichia	Leptotrichia_unclassified	99.3	Leptotrichia_buccalis	99.5	Leptotrichia_sp._HMT_225	0	0	0	0	0	0	0	0	0	0	0	4	1	0	0	0	0	40	0	0	0	0	0	0	0	0	0	0	193	0	0	0	0	0	0	0	0	0
	OTU260	Firmicutes	Bacilli	Lactobacillales	Aerococcaceae	Abiotrophia	Abiotrophia_defectiva	100	Abiotrophia_defectiva	100	Abiotrophia_defectiva	0	0	0	0	0	0	0	0	0	0	0	0	0	0	0	0	0	0	0	0	0	0	0	1147	0	0	0	0	0	0	0	0	0	0	0	0	0	0
	OTU902	Firmicutes	Negativicutes	Selenomonadales	Selenomonadaceae	Selenomonas	Selenomonas_unclassified	99.5	Selenomonas_infelix	99.8	Selenomonas_sp._HMT_479	1	0	1	128	0	0	2	0	0	0	2	6	1	8	0	2	11	18	0	0	1	0	0	0	0	0	0	0	390	0	0	0	0	0	0	30	1	0
	OTU133	Spirochaetes	Spirochaetes_c	Spirochaetales	Spirochaetaceae	Sphaerochaeta	JN713550_s	99.8	JN713550_s			1	0	0	0	0	0	0	0	0	0	0	0	0	0	0	0	0	92	159	581	0	87	0	0	0	10	0	12	66	0	0	1	0	0	0	0	0	0
	OTU172	Proteobacteria	Gammaproteobacteria	Enterobacteriales	Enterobacteriaceae	Proteus	Proteus_vulgaris	99.8	Proteus_vulgaris	99.3	Proteus_mirabilis	0	0	0	1	0	0	0	0	0	0	0	0	0	0	0	0	0	0	0	0	0	0	0	0	0	0	0	0	0	0	0	218	1109	0	0	0	0	0
	OTU272	Proteobacteria	Betaproteobacteria	Burkholderiales	Comamonadaceae	Brachymonas	HM099651_s	99.5	HM099651_s	96.5	Acidovorax_ebreus	0	14	0	0	23	0	0	0	0	1	0	0	0	0	0	0	0	0	0	0	0	0	0	0	0	0	6	0	0	0	0	0	0	0	0	0	0	0
	OTU134	Bacteroidetes	Bacteroidia	Bacteroidales	Bacteroidaceae	Bacteroides	Bacteroides_heparinolyticus	100	Bacteroides_heparinolyticus	100	Bacteroides_heparinolyticus	0	0	0	0	0	0	0	0	0	0	81	0	58	0	0	0	542	27	0	0	0	232	0	0	5	0	0	0	0	0	0	0	0	0	0	0	0	0
	OTU140	Firmicutes	Clostridia	Clostridiales	Mogibacterium_f	Mogibacterium	Mogibacterium_unclassified	97.3	JF240519_s	94.3	Mogibacterium_diversum	0	0	1	0	0	1	0	0	0	0	431	0	0	0	0	0	101	91	0	0	0	160	0	0	0	0	0	0	0	0	0	0	0	0	0	0	0	0
	OTU226	Firmicutes	Clostridia	Clostridiales	Lachnospiraceae	FJ202371_g	AM420271_s	99.3	AM420271_s	100	Lachnospiraceae_[G-8]_bacterium_HMT_500	153	189	0	0	112	0	1	0	0	0	0	12	0	0	0	0	27	1	1	0	8	0	1	0	0	0	0	0	0	9	0	12	7	0	0	0	25	0
	OTU248	Bacteroidetes	Bacteroidia	Bacteroidales	Prevotellaceae	Prevotella	AM420076_s	98.8	AM420076_s	99.3	Prevotella_sp._HMT_443	0	0	0	0	0	0	0	0	0	0	0	5	0	1	0	65	0	0	0	0	1	0	0	0	0	0	0	0	0	0	0	0	0	0	0	0	455	0
	OTU156	Actinobacteria	Actinobacteria_c	Actinomycetales	Actinomycetaceae	Actinobaculum	Actinobaculum_timonae	100	Actinobaculum_timonae	100	Peptidiphaga_sp._HMT_183	0	0	0	0	0	0	3	0	0	0	0	0	0	0	0	0	0	8	0	0	0	0	0	0	0	0	0	0	0	0	1	0	0	0	0	0	0	0
	OTU188	Firmicutes	Clostridia	Clostridiales	Mogibacterium_f	Eubacterium_g14	Eubacterium_saphenum	100	Eubacterium_saphenum	99.8	Peptostreptococcaceae_[XI][G-5]_saphenum	0	0	0	0	0	157	0	0	0	0	1	0	1	0	0	0	0	10	0	0	0	0	1	0	0	15	0	0	0	38	0	0	0	0	0	0	0	0
	OTU276	Firmicutes	Bacilli	Bacillales	Gemella_f	Gemella	Gemella_bergeri	100	Gemella_bergeri	100	Gemella_bergeri	0	0	0	0	0	0	0	0	0	1097	0	0	0	0	0	0	0	0	0	0	0	0	0	0	0	0	0	0	0	0	0	0	0	0	0	0	0	0
	OTU173	Actinobacteria	Actinobacteria_c	Bifidobacteriales	Bifidobacteriaceae	Scardovia	Scardovia_wiggsiae	100	Scardovia_wiggsiae	100	Scardovia_wiggsiae	0	0	0	0	0	0	0	0	0	0	0	0	4	0	0	0	0	0	0	0	0	0	0	0	0	0	80	0	0	0	0	0	0	0	0	0	0	0
	OTU464	Proteobacteria	Alphaproteobacteria	Sphingomonadales	Sphingomonadaceae	Sphingomonas	Sphingomonas_unclassified	99.8	JN020191_s	95.3	Sphingomonas_echinoides	0	0	0	0	0	0	0	0	0	0	0	0	0	0	0	0	0	0	0	0	0	0	0	0	0	0	0	0	0	0	0	0	0	0	0	0	0	0
	OTU196	Bacteroidetes	Flavobacteria	Flavobacteriales	Flavobacteriaceae	Capnocytophaga	KB291469_s	100	KB291469_s	100	Capnocytophaga_sp._HMT_326	0	0	0	0	0	0	0	0	1	0	0	3	1	0	0	0	0	8	0	0	0	0	0	0	0	0	0	0	185	0	0	0	0	0	0	7	0	0
	OTU273	Proteobacteria	Epsilonproteobacteria	Campylobacterales	Campylobacteraceae	Campylobacter	Campylobacter_curvus	99.5	Campylobacter_curvus	99.8	Campylobacter_curvus	0	0	0	583	0	0	0	7	0	0	0	0	4	0	0	0	0	0	1	0	0	0	0	0	0	0	0	0	0	0	0	0	0	0	0	0	6	0
	OTU208	Firmicutes	Clostridia	Clostridiales	Ruminococcaceae	Eubacterium_g23	HQ441590_s	99.5	HQ441590_s			0	0	0	0	0	0	0	0	0	0	441	53	0	0	0	0	0	355	2	0	0	0	1	0	0	0	0	0	0	0	0	0	0	0	0	0	0	0
	OTU342	Proteobacteria	Alphaproteobacteria	Rhodospirillales	Acetobacteraceae	DQ532333_g	DQ532333_g_unclassified	98.8	JF227128_s	90.8	Roseomonas_gilardii	0	0	0	0	0	0	0	0	0	0	0	0	0	0	0	0	0	0	0	0	1	0	0	0	0	0	0	0	0	0	0	0	0	0	0	0	0	0
	OTU74	Actinobacteria	Actinobacteria_c	Micrococcales	Micrococcaceae	Rothia	Rothia_dentocariosa	100	Rothia_dentocariosa	100	Rothia_dentocariosa	0	0	0	1	0	0	0	0	0	0	5	3	4	0	0	0	0	3	0	0	0	0	0	0	0	0	0	4	12	0	1	0	0	29	0	0	0	0
	OTU20	Proteobacteria	Alphaproteobacteria	Caulobacterales	Caulobacteraceae	Brevundimonas	Brevundimonas_albigilva	100	Brevundimonas_vesicularis Brevundimonas_nasdae Brevundimonas_albigilva	97.3	Brevundimonas_diminuta	0	0	0	0	0	0	0	0	0	0	0	0	2	0	0	0	0	0	0	0	0	0	0	451	0	0	5	0	117	0	0	0	0	0	0	97	0	0
	OTU455	Firmicutes	Negativicutes	Veillonellales	Veillonellaceae	Megasphaera	Megasphaera_micronuciformis	99.5	Megasphaera_micronuciformis	99.5	Megasphaera_micronuciformis	116	0	0	60	0	0	0	0	0	0	1	0	3	0	0	0	0	5	0	1	0	0	0	0	0	0	0	0	0	1	37	0	0	0	1	0	0	8
	OTU363	Bacteroidetes	Bacteroidia	Bacteroidales	EU845084_f	DQ003626_g	DQ003626_s	98.1	DQ003626_s	99.8	Bacteroidetes_[G-3]_bacterium_HMT_365	0	0	0	0	0	105	111	0	0	0	53	0	0	11	0	0	101	9	0	1	0	1	0	0	0	2	0	0	0	186	0	0	2	0	0	3	15	0
	OTU245	Firmicutes	Negativicutes	Selenomonadales	Selenomonadaceae	Selenomonas	JH992903_s	100	JH992903_s	100	Selenomonas_sp._HMT_133	2	0	0	0	0	0	0	0	0	0	0	0	0	0	0	0	0	0	0	0	0	0	0	0	0	0	0	0	45	0	0	0	0	0	0	18	0	0
	OTU274	Actinobacteria	Actinobacteria_c	Bifidobacteriales	Bifidobacteriaceae	Bifidobacterium	Bifidobacterium_unclassified	99.8	Bifidobacterium_dentium	99.8	Bifidobacterium_dentium	0	0	0	19	0	0	0	0	0	0	0	0	0	0	0	0	0	17	0	0	0	0	0	0	0	0	0	0	27	0	0	2	49	1	0	0	0	26
	OTU209	Bacteroidetes	Bacteroidia	Bacteroidales	Prevotellaceae	Prevotella	DQ003622_s	99.8	DQ003622_s	99.8	Prevotella_sp._HMT_515	0	0	0	0	0	1	0	0	0	0	0	0	0	118	0	496	0	2	2	3	0	43	0	0	0	0	0	0	0	0	0	0	0	0	0	0	0	0
	OTU193	Bacteroidetes	Bacteroidia	Bacteroidales	EU845084_f	AB494828_g	AF481207_s	100	AF481207_s	100	Bacteroidetes_[G-3]_bacterium_HMT_280	0	64	0	0	1	13	16	0	0	0	0	6	0	14	0	0	39	0	108	0	0	10	0	0	0	40	0	0	26	0	52	126	0	0	0	0	0	0
	OTU211	Spirochaetes	Spirochaetes_c	Spirochaetales	Spirochaetaceae	Treponema	AF182835_s	99.5	AF182835_s	100	Treponema_sp._HMT_256	0	0	0	0	0	0	0	0	0	0	1	1	0	0	1	0	0	3	0	0	0	0	0	0	0	0	0	0	0	0	1	0	0	0	0	0	0	0
	OTU373	Bacteroidetes	Bacteroidia	Bacteroidales	Prevotellaceae	Prevotella	AM419982_s	99.5	AM419982_s	99.5	Prevotella_sp._HMT_526	0	0	1	1	0	122	0	0	0	0	0	1	0	0	0	0	0	46	1	1	1	4	0	0	0	0	0	0	0	0	0	3	0	0	0	0	127	0
	OTU231	Firmicutes	Clostridia	Clostridiales	Mogibacterium_f	EU381776_g	FJ983022_s	99.8	FJ983022_s	100	Peptostreptococcaceae_[XI][G-2]_bacterium_HMT_091	59	0	114	20	9	12	21	0	0	0	14	17	0	16	36	0	20	9	2	0	13	32	0	0	0	1	0	0	20	31	0	2	0	0	0	0	7	0
	OTU238	Firmicutes	Tissierellia	Tissierellales	Peptoniphilaceae	Peptoniphilus	Peptoniphilus_lacrimalis	100	Peptoniphilus_lacrimalis	100	Peptoniphilus_lacrimalis	171	0	0	0	0	0	0	0	0	0	0	0	0	0	0	69	30	0	0	0	0	0	0	0	0	0	0	0	0	71	0	0	0	0	0	0	0	0
	OTU341	Firmicutes	Clostridia	Clostridiales	Ruminococcaceae	EF559154_g	AF481208_s	98.5	AF481208_s	98.5	Ruminococcaceae_[G-3]_bacterium_HMT_366	0	0	0	0	0	0	0	0	0	0	0	0	0	0	0	0	0	0	4	0	0	0	0	0	0	0	0	1	0	0	0	0	406	0	0	0	0	0
	OTU234	Proteobacteria	Deltaproteobacteria	Desulfovibrionales	Desulfovibrionaceae	Desulfovibrio	Desulfovibrio_unclassified	98.6	Desulfovibrio_fairfieldensis	100	Desulfovibrio_sp._HMT_040	0	0	0	0	0	0	0	0	0	0	1	0	0	0	0	0	0	0	401	0	0	0	0	0	1	0	0	140	0	0	0	0	0	0	0	0	0	0
	OTU297	Firmicutes	Clostridia	Clostridiales	Mogibacterium_f	EU842499_g	AM419965_s	100	AM419965_s	100	Peptostreptococcaceae_[XI][G-3]_bacterium_HMT_950	0	0	46	0	0	0	0	0	0	0	0	0	0	0	0	0	129	291	35	4	0	106	0	0	0	0	0	2	0	0	0	0	0	0	0	0	0	0
	OTU1467	Bacteroidetes	Cytophagia	Cytophagales	Hymenobacteraceae	Hymenobacter	Hymenobacter_unclassified	98.8	Hymenobacter_soli			0	0	0	0	0	0	0	0	0	0	0	0	0	0	0	0	0	0	0	0	0	0	0	0	0	0	0	0	0	0	0	0	0	0	0	0	0	0
	OTU223	Firmicutes	Clostridia	Clostridiales	Lachnospiraceae	Howardella	AF385567_s	100	AF385567_s	100	Lachnospiraceae_[G-7]_bacterium_HMT_086	0	0	47	15	0	1	3	8	0	0	1	3	0	17	0	4	11	0	9	0	11	1	2	0	0	0	1	0	0	128	0	190	37	0	0	0	2	61
	OTU240	Firmicutes	Clostridia	Clostridiales	Mogibacterium_f	AY134903_g	AY134903_s	100	AY134903_s	93.1	Peptostreptococcaceae_[XI][G-1]_infirmum	0	0	0	0	0	0	0	0	0	0	0	0	0	0	0	0	0	11	136	0	0	1	0	0	0	0	0	0	101	0	0	0	0	0	0	0	0	0
	OTU374	Bacteroidetes	Bacteroidia	Bacteroidales	Prevotellaceae	Prevotella	Prevotella_buccae	99.5	Prevotella_buccae	99.8	Prevotella_buccae	2	0	1	15	0	3	20	34	5	0	106	5	0	4	0	1	7	0	0	0	3	2	0	0	0	0	0	0	0	4	0	6	1	0	0	0	1	1
	OTU703	Bacteroidetes	Bacteroidia	Bacteroidales	Prevotellaceae	Prevotella	Prevotella_oulorum	99.3	Prevotella_oulorum	99.8	Prevotella_oulorum	47	0	0	19	0	0	2	3	0	0	0	4	1	4	0	0	0	0	0	0	0	0	0	0	0	0	0	0	23	0	0	0	0	0	0	0	0	109
	OTU275	Firmicutes	Negativicutes	Selenomonadales	Selenomonadaceae	Selenomonas	CP012071_s	98.4	CP012071_s	100	Selenomonas_sp._HMT_136	0	0	0	0	0	0	0	0	0	0	0	0	0	0	0	0	0	4	0	0	0	2	0	0	0	0	1	0	101	0	0	0	0	0	0	0	0	2
	OTU1853	Saccharibacteria_TM7	Saccharimonas_c	Saccharimonas_o	Saccharimonas_f	Saccharimonas	AY005448_s	98.5	AY005448_s	99.5	Saccharibacteria_(TM7)_[G-1]_bacterium_HMT_349	0	0	0	0	0	0	0	0	0	0	0	0	0	0	0	0	0	0	0	0	0	0	0	0	0	0	0	0	139	0	0	0	0	0	0	87	0	0
	OTU1835	Spirochaetes	Spirochaetes_c	Spirochaetales	Spirochaetaceae	Treponema	Treponema_socranskii	97.9	Treponema_socranskii	97.7	Treponema_sp._HMT_269	0	0	0	0	0	0	1	1	0	0	0	0	0	0	0	1	0	1	0	0	3	0	0	0	0	0	0	1	1	0	0	497	0	0	0	69	0	0
	OTU694	Bacteroidetes	Bacteroidia	Bacteroidales	Prevotellaceae	Prevotella	Prevotella_unclassified	99.3	HE999470_s Prevotella_shahii	99.5	Prevotella_sp._HMT_317	0	0	0	0	0	0	0	0	0	0	5	1	0	0	0	0	0	131	0	0	0	0	0	0	0	7	0	0	41	0	0	9	12	0	0	0	0	4
	OTU366	Firmicutes	Clostridia	Clostridiales	Ruminococcaceae	Ruminococcaceae_unclassified	Ruminococcaceae_unclassified	94.8	EU794085_s			0	0	0	0	0	0	0	0	0	0	0	0	0	0	0	0	0	0	0	0	0	0	0	587	0	0	0	0	0	0	0	0	0	0	0	0	0	0
	OTU221	Bacteroidetes	Bacteroidia	Bacteroidales	GU304534_f	GU304534_g	HE681238_s	99.8	HE681238_s			0	0	0	0	0	0	0	0	0	0	0	0	0	0	0	0	0	0	0	0	0	242	0	0	0	0	0	0	0	0	0	0	0	0	0	0	0	0
	OTU320	Firmicutes	Clostridia	Clostridiales	Christensenellaceae	GQ422712_g	GQ422712_s	98.8	GQ422712_s	98.8	Clostridiales_[F-1][G-1]_bacterium_HMT_093	0	0	10	0	0	18	0	0	0	0	0	1	0	15	0	0	66	0	0	0	0	0	0	0	0	0	0	0	0	0	0	4	4	0	0	34	163	0
	OTU215	Firmicutes	Erysipelotrichi	Erysipelotrichales	Erysipelotrichaceae	Bulleidia	Bulleidia_extructa	100	Bulleidia_extructa	99.8	Bulleidia_extructa	0	0	0	0	0	1	134	0	0	0	0	0	0	0	0	5	244	0	0	0	0	0	0	0	0	0	0	0	0	0	0	0	0	0	0	0	0	0
	OTU376	Bacteroidetes	Bacteroidia	Bacteroidales	Prevotellaceae	Prevotella	Prevotella_multisaccharivorax	99.8	Prevotella_multisaccharivorax	99.8	Prevotella_multisaccharivorax	0	0	0	0	0	0	1	0	0	0	3	2	4	0	0	0	15	0	0	0	2	0	0	0	0	0	0	0	0	0	0	0	1	0	0	0	0	0
	OTU419	Firmicutes	Clostridia	Clostridiales	Lachnospiraceae	Lachnoanaerobaculum	AF481219_s	100	AF481219_s	100	Lachnoanaerobaculum_sp._HMT_089	0	0	2	0	0	0	0	0	0	0	0	2	0	111	0	0	0	4	0	0	12	1	0	0	0	14	0	20	38	0	0	0	0	0	0	0	0	2
	OTU307	Bacteroidetes	Bacteroidia	Bacteroidales	Prevotellaceae	Prevotella	Prevotella_pleuritidis	99.5	Prevotella_pleuritidis	99.5	Prevotella_pleuritidis	0	0	0	0	0	1	0	0	0	0	0	0	0	0	0	250	15	6	0	0	124	0	0	0	0	0	0	0	1	68	0	0	0	0	0	0	0	0
	OTU388	Actinobacteria	Actinobacteria_c	Actinomycetales	Actinomycetaceae	Actinomyces	Actinomyces_oricola	98.8	Actinomyces_oricola	100	Actinomyces_oricola	0	0	0	0	0	0	0	0	0	0	0	0	0	0	0	0	0	0	0	0	0	0	0	0	0	0	0	0	32	0	0	0	0	0	0	0	0	0
	OTU314	Firmicutes	Clostridia	Clostridiales	Mogibacterium_f	FJ982993_g	FJ982993_s	100	FJ982993_s	100	Peptostreptococcaceae_[XI][G-3]_bacterium_HMT_495	0	0	4	0	12	1	0	2	0	0	23	1	0	0	6	7	41	60	8	1	0	1	0	0	0	0	0	20	0	0	229	8	0	0	0	0	0	0
	OTU844	Bacteroidetes	Bacteroidia	Bacteroidales	Prevotellaceae	Prevotella	AF385554_s	99.3	AF385554_s	99.3	Prevotella_sp._HMT_300	26	0	0	23	0	1	7	0	0	0	5	30	0	4	17	0	11	3	0	0	6	0	0	0	0	0	0	0	53	6	0	0	0	0	0	5	0	0
	OTU700	Actinobacteria	Actinobacteria_c	Propionibacteriales	Propionibacteriaceae	Friedmanniella	Friedmanniella_unclassified	98.5	DQ532175_s	91.2	Pseudopropionibacterium_propionicum	0	0	0	0	0	0	0	0	0	0	0	0	0	0	0	0	0	0	0	0	0	0	0	0	0	0	0	0	0	0	0	0	0	0	0	0	0	0
	OTU645	Fusobacteria	Fusobacteria_c	Fusobacteriales	Leptotrichiaceae	Leptotrichia	Leptotrichia_unclassified	99.5	AM420042_s	99.8	Leptotrichia_sp._HMT_212	0	0	0	0	0	0	0	0	0	0	0	0	0	0	0	0	0	1	0	0	0	0	0	0	0	0	0	0	0	0	0	0	0	0	0	0	0	0
	OTU414	Proteobacteria	Betaproteobacteria	Neisseriales	Neisseriaceae	Neisseria	Neisseria_elongata	100	Neisseria_elongata	100	Neisseria_elongata	0	1	0	0	0	0	1	0	0	0	0	0	0	0	0	0	0	0	0	0	0	0	0	0	0	0	0	0	0	0	0	0	0	0	0	0	0	0
	OTU282	Spirochaetes	Spirochaetes_c	Spirochaetales	Spirochaetaceae	Treponema	Treponema_unclassified	96.7	Treponema_amylovorum	99.1	Treponema_sp._HMT_257	0	0	0	0	0	0	0	0	301	0	0	0	0	0	0	0	0	0	0	0	0	0	0	0	0	1	0	0	0	0	0	0	0	0	0	0	0	0
	OTU934	Bacteroidetes	Bacteroidia	Bacteroidales	Porphyromonadaceae	Porphyromonas	JF239777_s	98.8	JF239777_s	98.6	Porphyromonas_catoniae	0	0	0	0	0	0	0	0	0	0	0	0	0	0	0	0	0	0	0	0	0	0	0	0	0	0	0	0	0	0	0	0	0	0	0	0	1	0
	OTU489	Bacteroidetes	Bacteroidia	Bacteroidales	Porphyromonadaceae	Tannerella	AYUF_s	99.5	AYUF_s	99.8	Tannerella_sp._HMT_808	0	0	0	0	0	0	2	0	0	0	0	1	0	0	0	0	0	0	0	0	0	0	0	0	0	0	0	0	65	0	0	0	2	0	0	0	0	0
	OTU640	Gemmatimonadetes	Longimicrobia	Longimicrobiales	GQ263002_f	GQ263002_g	GQ263002_g_unclassified	95.6	GQ263002_s JQ428201_s			0	0	0	0	0	0	0	0	0	0	0	0	0	0	0	0	0	0	0	0	0	0	0	431	0	0	0	0	0	0	0	0	0	0	0	0	0	0
	OTU606	Proteobacteria	Gammaproteobacteria	Pasteurellales	Pasteurellaceae	Aggregatibacter	Aggregatibacter_segnis	100	Aggregatibacter_segnis	100	Aggregatibacter_segnis	0	0	1	0	0	0	2	0	0	0	1	0	0	0	0	0	0	0	0	0	0	0	0	0	0	0	0	0	0	0	0	0	0	0	0	0	0	0
	OTU1087	Proteobacteria	Betaproteobacteria	Neisseriales	Neisseriaceae	Neisseriaceae_unclassified	Neisseriaceae_unclassified	97.9	Eikenella_corrodens	98.1	Eikenella_corrodens	0	92	0	0	0	0	0	0	0	0	0	0	2	0	0	0	0	2	0	0	0	0	0	0	0	88	0	0	0	0	0	0	0	0	0	0	0	0
	OTU299	Bacteroidetes	Bacteroidia	Bacteroidales	Porphyromonadaceae	Porphyromonas	Porphyromonas_uenonis	96.9	Porphyromonas_uenonis	96.7	Porphyromonas_uenonis	0	0	0	0	0	0	0	0	0	0	339	0	0	0	0	2	0	0	0	0	0	0	0	0	0	0	0	0	0	0	0	0	0	0	0	0	0	1
	OTU321	Firmicutes	Clostridia	Clostridiales	Ruminococcaceae	JN713389_g	AM420048_s	99.5	AM420048_s	100	Ruminococcaceae_[G-1]_bacterium_HMT_075	0	0	0	0	0	0	0	0	0	0	0	0	0	0	0	0	0	0	0	0	0	0	0	0	0	0	0	0	158	0	0	0	0	0	0	25	0	0
	OTU593	Firmicutes	Clostridia	Clostridiales	Lachnospiraceae	Moryella	Stomatobaculum_longum	99.5	Stomatobaculum_longum	100	Stomatobaculum_sp._HMT_910	0	0	0	45	0	0	0	0	0	0	0	0	1	0	0	0	0	4	0	0	1	0	0	0	0	0	0	0	0	0	0	0	0	0	0	28	0	0
	OTU400	Firmicutes	Negativicutes	Selenomonadales	Selenomonadaceae	Selenomonas	Selenomonas_artemidis	98.6	Selenomonas_artemidis	98.6	Selenomonas_artemidis	18	0	0	3	0	0	0	0	0	0	0	0	0	0	0	0	0	0	0	0	0	0	0	0	0	0	0	0	19	0	0	0	0	0	0	44	0	0
	OTU468	Firmicutes	Clostridia	Clostridiales	Peptostreptococcaceae	Eubacterium_g15	JH414580_s	99.8	JH414580_s	100	Peptostreptococcaceae_[XI][G-7]_bacterium_HMT_081	101	0	0	0	0	0	0	0	0	0	0	29	0	0	0	0	112	2	0	0	0	0	1	0	0	0	0	0	0	0	0	0	0	0	0	0	0	0
	OTU648	Bacteroidetes	Bacteroidia	Bacteroidales	Prevotellaceae	Alloprevotella	Alloprevotella_rava	99.3	Alloprevotella_rava	100	Alloprevotella_rava	52	0	0	0	0	22	18	0	0	0	0	4	0	1	44	0	4	0	0	0	7	0	0	0	0	0	0	0	0	30	0	0	0	0	0	0	5	0
	OTU658	Bacteroidetes	Bacteroidia	Bacteroidales	Prevotellaceae	Prevotella	Prevotella_enoeca	99.3	Prevotella_enoeca	99.3	Prevotella_enoeca	108	0	0	0	1	0	0	0	0	0	0	0	0	0	79	0	0	0	0	0	0	0	0	0	0	0	0	0	0	4	0	0	0	0	0	0	0	0
	OTU219	Actinobacteria	Actinobacteria_c	Corynebacteriales	CP009312_f	CP009312_g	CP009312_s	99.8	CP009312_s	99.8	Lawsonella_clevelandensis	0	0	0	0	0	0	0	0	0	0	0	0	0	0	0	0	3	0	0	0	0	0	0	0	0	0	0	0	0	0	0	38	93	0	0	0	0	0
	OTU100	Proteobacteria	Alphaproteobacteria	Sphingomonadales	Sphingomonadaceae	Sphingobium	Sphingobium_limneticum	100	Sphingobium_limneticum	96.3	Sphingomonas_sp._HMT_006	0	0	0	0	0	0	0	0	0	0	0	0	1	0	0	0	0	0	0	0	0	0	0	328	0	0	0	0	0	0	21	0	0	0	0	0	0	0
	OTU496	Proteobacteria	Gammaproteobacteria	Cardiobacteriales	Cardiobacteriaceae	Cardiobacterium	Cardiobacterium_valvarum	99.1	Cardiobacterium_valvarum	99.5	Cardiobacterium_valvarum	0	0	0	0	0	0	0	0	0	0	0	0	0	0	0	0	0	13	0	0	0	0	0	0	0	0	0	0	0	0	0	0	0	0	0	30	0	0
	OTU339	Bacteroidetes	Bacteroidia	Bacteroidales	AY244965_f	AY244965_g	AM420070_s	99.8	AM420070_s			0	0	0	0	0	0	0	0	0	0	0	0	0	0	0	0	0	0	335	0	0	0	0	0	0	0	0	0	0	0	0	0	0	0	0	0	0	0
	OTU397	Firmicutes	Clostridia	Clostridiales	Lachnospiraceae	AF287775_g	AM420052_s	100	AM420052_s	100	Lachnospiraceae_[G-3]_bacterium_HMT_100	0	0	0	0	0	0	0	15	0	0	0	1	41	0	0	0	0	12	0	0	0	0	0	0	0	0	0	0	0	0	0	0	0	0	0	45	0	0
	OTU257	Bacteroidetes	Bacteroidia	Bacteroidales	Prevotellaceae	Prevotella	Hallella_seregens	100	Hallella_seregens Prevotella_dentalis	100	Prevotella_dentalis	0	0	1	0	0	6	0	0	0	0	2	0	0	13	0	0	20	0	0	0	2	4	0	0	0	0	0	0	0	5	0	6	0	0	0	0	104	0
	OTU633	Bacteroidetes	Bacteroidia	Bacteroidales	Prevotellaceae	Alloprevotella	AM420222_s	99.1	AM420222_s	100	Alloprevotella_sp._HMT_913	0	0	2	0	0	1	0	176	0	0	0	0	0	72	0	27	1	0	0	0	4	0	0	0	0	0	0	0	0	3	0	0	0	0	0	0	0	0
	OTU664	Spirochaetes	Spirochaetes_c	Spirochaetales	Spirochaetaceae	Treponema	Treponema_amylovorum	100	Treponema_amylovorum	99.8	Treponema_amylovorum	0	0	0	0	0	5	0	0	0	0	0	0	0	0	0	0	0	199	0	0	0	0	0	0	0	0	0	2	0	0	0	0	0	0	0	0	0	0
	OTU262	Synergistetes	Synergistia	Synergistales	Jonquetella_f	Pyramidobacter	Pyramidobacter_piscolens	95.3	Pyramidobacter_piscolens	95.5	Pyramidobacter_piscolens	0	0	0	0	0	0	0	0	0	0	0	0	0	0	0	0	0	0	300	19	0	0	0	0	0	0	0	0	0	0	0	0	0	0	0	0	0	0
	OTU261	Firmicutes	Clostridia	Clostridiales	Christensenellaceae	GQ422712_g	JN713425_s	95.8	JN713425_s			0	0	0	0	0	0	0	0	0	0	0	0	0	0	0	0	0	0	202	61	0	4	0	0	0	0	0	0	0	0	0	0	0	0	0	0	0	0
	OTU604	Firmicutes	Clostridia	Clostridiales	Ruminococcaceae	Ruminococcus	Ruminococcus_unclassified	99	EU464196_s			0	0	0	0	0	0	0	0	0	0	0	0	0	0	0	0	0	0	0	0	0	0	0	314	0	0	0	0	0	0	0	0	0	0	0	0	0	0
	OTU562	Bacteroidetes	Bacteroidia	Bacteroidales	Prevotellaceae	Prevotella	KI259591_s	99.1	Prevotella_jejuni KI259591_s Prevotella_histicola	98.8	Prevotella_sp._HMT_314	0	0	0	40	0	0	0	0	41	0	1	48	0	1	0	0	1	2	0	0	0	0	0	0	1	0	0	0	8	2	0	0	0	0	0	0	0	0
	OTU280	Proteobacteria	Deltaproteobacteria	Desulfovibrionales	Desulfovibrionaceae	Desulfovibrio	Desulfovibrio_desulfuricans	99.5	Desulfovibrio_desulfuricans	97	Desulfovibrio_fairfieldensis	0	0	0	0	0	0	0	0	0	0	0	0	0	0	0	0	0	0	0	0	0	0	0	0	1	0	0	0	0	295	0	0	0	0	0	0	0	0
	OTU2191	Actinobacteria	Actinobacteria_c	Actinomycetales	Actinomycetaceae	Actinomyces	AY278610_s	99.3	AY278610_s	99.5	Actinomyces_sp._HMT_414	0	0	0	0	0	0	0	0	0	0	1	1	3	0	0	0	0	52	0	0	0	0	0	0	0	0	0	0	0	0	0	0	0	0	0	154	0	0
	OTU628	Firmicutes	Bacilli	Bacillales	Exiguobacteriaceae	Exiguobacterium	Exiguobacterium_alkaliphilum	100	Exiguobacterium_aestuarii Exiguobacterium_profundum	90.9	Lysinibacillus_fusiformis	0	0	0	0	0	0	0	0	0	0	0	0	0	0	0	0	0	0	0	0	0	0	0	0	0	0	0	0	0	0	0	0	0	0	0	0	0	0
	OTU333	Bacteroidetes	Bacteroidia	Bacteroidales	Prevotellaceae	Prevotella	Prevotella_oralis	100	Prevotella_oralis	100	Prevotella_oralis	0	0	0	0	0	1	1	0	13	0	0	0	0	5	0	43	2	2	0	0	0	1	0	0	0	0	0	0	17	0	0	0	0	0	0	0	0	27
	OTU662	Firmicutes	Clostridia	Clostridiales	Christensenellaceae	HQ716403_g	EF436352_s	100	EF436352_s			0	0	0	0	0	0	0	0	0	0	0	0	0	0	0	0	0	0	0	0	0	0	0	275	0	0	0	0	0	0	0	0	0	0	0	0	0	0
	OTU463	Proteobacteria	Betaproteobacteria	Neisseriales	Neisseriaceae	Neisseriaceae_unclassified	Neisseriaceae_unclassified	97.7	Eikenella_corrodens	96.5	Eikenella_sp._HMT_011	0	0	0	0	0	0	0	0	2	0	0	0	0	0	0	0	0	0	0	0	0	0	0	0	0	1	0	0	0	0	0	0	0	0	0	0	0	0
	OTU609	Firmicutes	Bacilli	Lactobacillales	Streptococcaceae	Streptococcus	Streptococcus_massiliensis	100	Streptococcus_massiliensis	95.3	Streptococcus_intermedius	0	0	0	264	0	0	0	0	0	0	0	0	0	0	0	0	1	0	0	0	0	0	0	0	0	0	0	0	0	0	0	0	0	0	0	0	0	0
	OTU750	Actinobacteria	Thermoleophilia	Solirubrobacterales	Conexibacteraceae	Conexibacter	Conexibacter_unclassified	95.3	JIAT_s JX098318_s			0	0	0	0	0	0	0	0	0	0	0	0	0	0	0	0	0	0	0	0	0	0	0	262	0	0	0	0	0	0	0	0	0	0	0	0	0	0
	OTU940	Bacteroidetes	Bacteroidia	Bacteroidales	Prevotellaceae	Prevotella	Prevotella_maculosa	99.1	Prevotella_maculosa	99.8	Prevotella_maculosa	31	0	0	1	0	0	0	0	0	0	0	6	1	0	1	0	0	6	0	0	8	0	0	0	0	0	0	0	30	0	0	1	0	0	0	0	0	0
	OTU476	Firmicutes	Clostridia	Clostridiales	Lachnospiraceae	Catonella	JX548363_s	99.8	JX548363_s	95.5	Butyrivibrio_sp._HMT_090	0	0	1	0	0	0	0	0	0	0	3	0	0	0	0	0	0	0	175	6	0	16	0	0	0	0	0	48	0	0	0	0	0	0	0	0	0	0
	OTU1256	Bacteroidetes	Bacteroidia	Bacteroidales	Porphyromonadaceae	AM420159_g	AM420159_s	99.3	AM420159_s	99	Bacteroidetes_[G-5]_bacterium_HMT_505	0	0	0	0	0	0	0	0	0	0	0	2	0	0	0	0	0	6	0	0	0	0	0	0	0	0	0	0	0	0	0	0	0	0	0	0	0	0
	OTU354	Actinobacteria	Actinobacteria_c	Actinomycetales	Actinomycetaceae	Actinobaculum	GG703879_s	100	GG703879_s	100	Peptidiphaga_gingivicola	0	0	0	0	0	0	0	0	0	0	0	0	0	0	0	0	1	0	0	0	0	0	0	0	0	0	0	0	39	0	0	0	0	0	0	0	0	0
	OTU542	Firmicutes	Clostridia	Clostridiales	Lachnospiraceae	Johnsonella	AF287774_s	99	AF287774_s	99.5	Johnsonella_sp._HMT_166	0	0	0	0	0	0	0	0	0	0	0	0	0	0	0	0	0	0	0	0	11	0	0	0	0	27	0	0	0	0	0	0	0	0	0	0	0	0
	OTU398	Spirochaetes	Spirochaetes_c	Spirochaetales	Spirochaetaceae	Treponema	Treponema_parvum	100	Treponema_parvum	100	Treponema_parvum	0	0	3	0	0	5	1	0	1	0	1	0	0	0	0	1	0	5	5	0	0	2	0	0	0	6	0	40	8	0	0	0	0	0	0	0	0	0
	OTU305	Bacteroidetes	Bacteroidia	Bacteroidales	Prevotellaceae	GU304053_g	GQ495892_s	99.5	GQ495892_s			0	0	0	0	0	0	8	0	0	0	1	0	0	1	0	2	4	0	1	131	0	1	0	0	0	0	0	8	0	0	0	0	13	0	0	0	0	1
	OTU451	Firmicutes	Negativicutes	Veillonellales	Veillonellaceae	Megasphaera	AF287784_s	99.8	AF287784_s	99.5	Megasphaera_sp._HMT_123	0	0	0	0	0	0	0	0	0	0	0	0	0	0	0	1	0	0	0	0	0	0	0	0	0	0	0	0	18	0	0	0	0	0	0	0	0	104
	OTU352	Firmicutes	Clostridia	Clostridiales	Lachnospiraceae	Butyrivibrio	AF287772_s	100	AF287772_s	100	Butyrivibrio_sp._HMT_080	0	0	0	0	0	82	0	0	0	0	0	0	0	0	0	0	0	1	0	0	0	0	0	0	0	0	0	0	0	0	0	0	0	0	0	0	0	0
	OTU536	Bacteroidetes	Bacteroidia	Bacteroidales	Prevotellaceae	Prevotella	AY550996_s	99.1	AY550996_s	92.9	Prevotella_multisaccharivorax	0	0	0	0	0	0	0	0	0	0	0	0	0	0	0	2	1	0	0	145	0	0	0	0	0	0	0	0	0	0	0	0	0	0	0	0	0	0
	OTU382	Saccharibacteria_TM7	Saccharimonas_c	Saccharimonas_o	Saccharimonas_f	FJ470493_g	FJ470493_s	99.5	FJ470493_s	100	Saccharibacteria_(TM7)_[G-2]_bacterium_HMT_350	0	0	0	0	0	0	0	0	0	0	0	0	0	0	0	0	0	0	0	0	0	0	0	0	0	0	0	0	18	0	0	0	0	0	0	72	0	0
	OTU355	Bacteroidetes	Bacteroidia	Bacteroidales	Bacteroidaceae	Bacteroides	Bacterium_zoogleiformans	98.8	Bacterium_zoogleiformans	100	Bacteroides_zoogleoformans	0	0	0	0	0	0	0	0	0	0	0	0	0	0	0	0	0	78	142	0	0	0	0	0	0	0	0	0	0	0	0	0	0	0	0	0	0	0
	OTU697	Proteobacteria	Betaproteobacteria	Neisseriales	Neisseriaceae	Neisseria	Neisseria_bacilliformis	100	Neisseria_bacilliformis	100	Neisseria_bacilliformis	0	0	0	0	0	0	1	0	0	0	0	0	0	0	0	0	0	0	0	0	0	0	0	0	0	0	0	0	0	0	0	0	0	0	0	0	0	0
	OTU416	Bacteroidetes	Bacteroidia	Bacteroidales	Porphyromonadaceae	Porphyromonas	Porphyromonas_uenonis	100	Porphyromonas_uenonis	99.3	Porphyromonas_uenonis	0	0	0	0	0	0	0	0	0	0	0	0	0	0	0	213	0	0	0	0	0	0	0	0	0	0	0	0	0	0	0	0	0	0	0	0	0	0
	OTU1736	Fusobacteria	Fusobacteria_c	Fusobacteriales	Leptotrichiaceae	Leptotrichia	AY134896_s	99.5	AY134896_s	97.3	Leptotrichia_hongkongensis	0	0	0	0	0	0	0	0	0	0	1	0	0	0	0	1	0	5	0	0	0	0	0	0	0	0	0	0	0	0	0	0	0	0	0	90	0	0
	OTU833	Proteobacteria	Alphaproteobacteria	Rhodobacterales	Rhodobacteraceae	Rhodobaculum	FM956477_s	98.5	FM956477_s	90	Mesorhizobium_loti	0	0	0	0	0	0	0	0	0	0	0	0	0	0	0	0	0	0	0	0	0	0	0	209	0	0	0	0	0	0	0	0	0	0	0	0	0	0
	OTU1931	Fusobacteria	Fusobacteria_c	Fusobacteriales	Leptotrichiaceae	Leptotrichia	AF287814_s	99	AF287814_s	99.5	Leptotrichia_sp._HMT_223	0	0	0	0	0	0	0	0	0	0	0	0	0	0	0	0	0	1	0	0	0	0	0	0	0	0	0	0	0	0	0	0	0	0	0	0	0	0
	OTU344	Actinobacteria	Actinobacteria_c	Bifidobacteriales	Bifidobacteriaceae	Parascardovia	Parascardovia_denticolens	100	Parascardovia_denticolens	100	Parascardovia_denticolens	0	0	0	0	0	0	34	0	0	0	2	0	0	0	0	1	0	0	0	0	0	0	0	0	0	0	0	0	0	1	0	0	37	0	0	0	0	0
	OTU576	Actinobacteria	Actinobacteria_c	Corynebacteriales	Corynebacteriaceae	Corynebacterium	Corynebacterium_durum	99.3	Corynebacterium_durum	99.5	Corynebacterium_durum	0	0	1	0	0	0	0	0	0	0	0	0	0	0	0	0	0	4	0	0	0	0	0	0	0	0	0	0	0	0	0	0	0	0	0	0	0	0
	OTU508	Synergistetes	Synergistia	Synergistales	Jonquetella_f	Jonquetella	Jonquetella_anthropi	98.8	Jonquetella_anthropi	99.8	Jonquetella_anthropi	0	0	0	0	0	0	0	0	0	0	0	0	0	0	0	0	0	0	0	0	0	0	0	0	0	0	0	0	0	0	0	4	18	0	0	0	0	0
	OTU401	Firmicutes	Clostridia	Clostridiales	Peptococcaceae	Peptococcaceae_unclassified	Peptococcaceae_unclassified	92.7	AM278590_s	90.2	Peptococcus_sp._HMT_167	0	0	5	0	0	0	0	0	0	0	0	0	0	0	0	0	0	0	119	12	0	32	0	0	0	0	0	0	0	0	0	0	0	0	0	0	0	0
	OTU438	Bacteroidetes	Bacteroidia	Bacteroidales	Prevotellaceae	Prevotella	AY005065_s	100	AY005065_s	100	Prevotella_sp._HMT_304	0	0	0	0	0	59	0	0	0	0	0	0	0	0	0	0	0	0	8	0	0	0	0	0	0	3	0	0	0	0	0	0	0	0	0	0	0	0
	OTU2019	Firmicutes	Bacilli	Lactobacillales	Enterococcaceae	Enterococcus	Enterococcus_faecalis	99.8	Enterococcus_faecalis	96.8	Enterococcus_faecalis	0	0	0	0	0	0	0	0	0	0	0	0	0	0	0	0	0	0	0	0	0	0	0	0	0	0	0	0	0	0	0	0	0	0	0	181	0	0
	OTU1961	Bacteroidetes	Bacteroidia	Bacteroidales	EU845084_f	DQ003626_g	DQ003626_s	98.1	DQ003626_s	98.1	Bacteroidetes_[G-3]_bacterium_HMT_365	0	0	0	0	0	8	21	0	0	0	0	0	0	0	0	0	0	0	0	0	0	0	0	0	0	0	0	0	0	0	0	0	1	0	0	0	77	0
	OTU1110	Actinobacteria	Actinobacteria_c	Propionibacteriales	Nocardioidaceae	Nocardioides	Nocardioides_unclassified	95.5	KB822597_s			0	0	0	0	0	0	0	0	0	0	0	0	0	0	0	0	0	0	0	0	0	0	0	175	0	0	0	0	0	0	0	0	0	0	0	0	0	0
	OTU769	Firmicutes	Negativicutes	Selenomonadales	Selenomonadaceae	Selenomonas	D89882_s	99.5	D89882_s	96	Selenomonas_sp._HMT_134	0	0	0	0	0	0	0	0	0	0	0	0	0	0	0	0	0	0	0	0	3	0	0	0	0	0	0	0	42	0	0	0	0	0	0	0	0	0
	OTU725	Spirochaetes	Spirochaetes_c	Spirochaetales	Spirochaetaceae	Treponema	Treponema_pectinovorum	99.8	Treponema_pectinovorum	100	Treponema_pectinovorum	0	0	0	0	0	0	0	0	3	0	0	20	0	0	0	0	0	114	0	0	11	0	0	0	0	0	0	0	0	0	0	0	0	0	0	0	0	0
	OTU713	Bacteroidetes	Bacteroidia	Bacteroidales	Prevotellaceae	Prevotella	Prevotella_saccharolytica	99.8	Prevotella_saccharolytica	99.8	Prevotella_saccharolytica	0	0	0	0	0	0	2	0	0	0	0	0	18	0	0	0	0	6	0	0	0	0	0	0	0	0	0	0	0	0	0	0	0	0	0	0	0	0
	OTU1867	Actinobacteria	Actinobacteria_c	Propionibacteriales	Propionibacteriaceae	Propionibacterium	Propionibacterium_acidifaciens	98.3	Propionibacterium_acidifaciens	98	Acidipropionibacterium_acidifaciens	0	0	1	0	0	0	0	0	0	0	0	0	0	0	0	0	0	0	0	0	0	0	73	0	0	2	0	0	0	0	2	38	4	0	0	0	0	27
	OTU596	Bacteroidetes	Bacteroidia	Bacteroidales	EU845084_f	EU845084_g	JQ406536_s	99.8	JQ406536_s	99.8	Bacteroidetes_[G-3]_bacterium_HMT_899	0	0	0	0	0	0	0	0	0	0	30	0	0	0	0	0	0	0	0	0	0	0	0	0	0	0	0	0	39	0	0	0	0	0	0	0	0	0
	OTU802	Bacteroidetes	Bacteroidia	Bacteroidales	Prevotellaceae	Prevotella	AY349394_s	100	AY349394_s	100	Prevotella_sp._HMT_315	39	0	0	0	0	9	0	0	0	0	0	39	0	2	0	1	0	0	0	0	11	0	0	0	0	0	0	0	0	8	0	0	0	0	0	0	1	0
	OTU1082	Proteobacteria	Gammaproteobacteria	Cardiobacteriales	Cardiobacteriaceae	Cardiobacterium	Cardiobacterium_hominis	100	Cardiobacterium_hominis	100	Cardiobacterium_hominis	0	0	0	0	0	0	0	0	0	0	0	0	0	0	0	0	0	3	0	0	0	0	0	0	0	0	0	0	0	0	0	0	0	0	0	0	0	0
	OTU1774	Bacteroidetes	Flavobacteria	Flavobacteriales	Flavobacteriaceae	Capnocytophaga	Capnocytophaga_leadbetteri	97.2	Capnocytophaga_leadbetteri	97.2	Capnocytophaga_leadbetteri	0	0	0	0	0	0	0	0	0	0	0	1	0	0	0	0	0	0	0	0	0	0	0	0	0	0	0	0	0	0	0	0	0	0	0	0	0	0
	OTU718	Bacteroidetes	Bacteroidia	Bacteroidales	Prevotellaceae	Alloprevotella	AY349402_s	98.1	AY349402_s	98.1	Alloprevotella_sp._HMT_473	0	0	0	0	0	0	2	0	0	0	0	0	0	0	0	0	0	0	0	0	0	0	0	0	0	0	0	0	0	0	0	0	0	0	0	0	11	0
	OTU938	Bacteroidetes	Bacteroidia	Bacteroidales	Bacteroidaceae	Bacteroides	EU778718_s	97.4	EU778718_s	91.5	Bacteroides_heparinolyticus	0	0	0	0	0	0	0	0	0	0	0	0	0	0	0	0	0	0	0	0	0	0	0	127	0	0	0	0	0	0	0	0	0	0	0	0	0	0
	OTU603	Firmicutes	Bacilli	Lactobacillales	Lactobacillaceae	Lactobacillus	Lactobacillus_panis	99.8	Lactobacillus_panis	99.8	Lactobacillus_panis	0	0	0	18	0	0	6	0	0	0	2	7	0	1	0	0	0	0	0	2	0	0	0	0	0	0	0	0	0	0	0	0	0	0	0	0	0	1
	OTU453	Firmicutes	Clostridia	Clostridiales	Ruminococcaceae	HE681294_g	HE681294_s	99.8	HE681294_s	91.6	Fastidiosipila_sanguinis	0	0	0	0	0	67	0	0	0	0	0	0	0	0	0	0	0	0	22	0	0	2	0	0	0	0	0	0	0	0	0	0	0	0	0	0	0	0
	OTU308	Proteobacteria	Deltaproteobacteria	Desulfovibrionales	Desulfovibrionaceae	Bilophila	Bilophila_wadsworthia	100	Bilophila_wadsworthia	90.2	Desulfovibrio_fairfieldensis	0	0	0	0	0	0	0	0	0	0	0	0	0	0	0	0	0	0	0	0	0	0	0	0	2	0	0	0	0	90	0	7	21	0	0	0	0	0
	OTU582	Bacteroidetes	Bacteroidia	Bacteroidales	EU845084_f	AB494828_g	AY341819_s	99.5	AY341819_s	99.5	Bacteroidetes_[G-3]_bacterium_HMT_436	0	0	0	0	0	0	0	0	0	0	0	0	0	0	102	0	0	1	3	0	0	0	0	0	0	0	0	0	0	0	0	0	0	0	0	0	0	0
	OTU523	Bacteroidetes	Bacteroidia	Bacteroidales	Prevotellaceae	Prevotella	EU669567_s	100	EU669567_s	91	Prevotella_shahii	0	0	0	0	0	0	0	0	0	0	0	0	0	0	0	0	0	0	0	0	0	0	0	0	0	0	0	0	25	0	0	0	0	0	0	0	0	0
	OTU1898	Spirochaetes	Spirochaetes_c	Spirochaetales	Spirochaetaceae	Treponema	AF023032_s	99.1	AF023032_s	99.3	Treponema_sp._HMT_246	0	0	0	0	0	0	0	0	0	0	0	0	0	0	0	0	0	0	0	0	0	0	0	0	0	0	0	0	0	0	0	0	0	0	0	0	0	0
	OTU882	Firmicutes	Clostridia	Clostridiales	Lachnospiraceae	Oribacterium	Oribacterium_parvum	100	Oribacterium_parvum	100	Oribacterium_parvum	0	0	0	0	0	0	0	50	0	0	1	1	1	0	0	0	0	0	0	0	0	0	0	0	0	0	0	0	0	0	0	0	0	0	0	0	0	0
	OTU560	Tenericutes	Mollicutes	Mycoplasmatales	Mycoplasmataceae	Mycoplasma_g4	Mycoplasma_faucium	100	Mycoplasma_faucium	100	Mycoplasma_faucium	0	0	0	0	0	0	0	0	0	0	0	0	0	0	0	0	1	0	0	0	0	0	0	0	0	3	0	1	0	0	26	0	0	0	0	0	4	0
	OTU2087	Firmicutes	Bacilli	Lactobacillales	Lactobacillales_unclassified	Lactobacillales_unclassified	Lactobacillales_unclassified	94.6	Enterococcus_faecalis	94.6	Enterococcus_faecalis	0	0	0	0	0	0	0	0	0	0	0	0	0	0	0	0	0	0	0	0	0	0	0	0	1	1	0	0	0	0	0	0	0	0	88	0	0	0
	OTU1241	Proteobacteria	Deltaproteobacteria	Desulfovibrionales	Desulfovibrionaceae	Desulfovibrio	DQ308592_s	100	DQ308592_s	92.7	Desulfovibrio_sp._HMT_040	0	0	0	0	0	0	0	0	0	0	0	0	0	0	0	0	0	0	0	0	0	0	0	0	0	0	0	0	0	0	0	0	0	0	0	0	0	0
	OTU747	Bacteroidetes	Bacteroidia	Bacteroidales	Bacteroidaceae	Bacteroides	Bacteroides_caecigallinarum	99.8	Bacteroides_caecigallinarum	91.5	Bacteroides_zoogleoformans	0	0	0	0	0	0	0	0	0	0	0	0	0	0	0	0	0	0	0	0	0	0	0	88	0	0	0	0	0	0	1	0	0	0	0	0	0	0
	OTU548	Actinobacteria	Actinobacteria_c	Actinomycetales	Actinomycetaceae	Actinomyces	AB490162_s	100	AB490162_s	91.5	Actinomyces_timonensis	0	0	0	0	0	0	0	0	0	0	0	0	0	0	0	0	0	0	0	0	0	4	0	0	0	0	0	0	0	0	0	0	0	0	0	0	0	0
	OTU727	Proteobacteria	Betaproteobacteria	Burkholderiales	Sutterellaceae	Sutterella	CVTY_s	100	CVTY_s	90.9	Schlegelella_thermodepolymerans	0	0	0	0	0	0	0	0	0	0	0	0	0	0	0	1	0	0	0	0	0	0	0	0	0	0	0	0	0	0	0	0	0	0	0	0	0	0
	OTU920	Actinobacteria	Actinobacteria_c	Actinomycetales	Actinomycetaceae	Actinomyces	GU227175_s	99.8	GU227175_s	95	Actinomyces_sp._HMT_175	0	0	0	0	0	0	0	0	0	0	0	0	0	0	0	0	0	0	0	0	0	0	0	0	0	0	0	0	0	0	0	0	0	0	0	82	0	0
	OTU905	Bacteroidetes	Bacteroidia	Bacteroidales	Prevotellaceae	Prevotella	Prevotella_micans	99.8	Prevotella_micans	99.8	Prevotella_micans	0	0	0	0	0	0	1	0	0	0	2	0	0	0	0	0	0	4	0	0	23	0	0	0	0	0	0	0	0	3	0	0	0	0	0	0	0	0
	OTU1078	Actinobacteria	Actinobacteria_c	Bifidobacteriales	Bifidobacteriaceae	Scardovia	Scardovia_inopinata	99.8	Scardovia_inopinata	99.8	Scardovia_inopinata	0	0	0	0	0	0	0	0	0	0	8	1	0	0	0	0	0	0	0	0	0	0	0	0	0	0	0	0	0	0	0	0	0	0	0	0	0	0
	OTU656	Bacteroidetes	Flavobacteria	Flavobacteriales	Flavobacteriaceae	Capnocytophaga	GL872416_s	99.8	GL872416_s	100	Capnocytophaga_sp._HMT_338	0	0	0	0	0	0	0	0	0	0	0	0	0	0	0	0	0	0	0	0	0	0	0	0	0	1	0	0	8	0	0	0	0	0	0	0	1	0
	OTU679	Proteobacteria	Betaproteobacteria	Neisseriales	Neisseriaceae	Neisseria	Neisseria_unclassified	99.8	Neisseria_perflava	100	Neisseria_flavescens	0	0	0	0	0	0	0	0	0	0	2	0	0	0	0	0	0	0	0	0	0	0	0	0	0	0	0	0	0	0	0	0	0	0	0	0	0	0
	OTU705	Firmicutes	Clostridia	Clostridiales	Lachnospiraceae	Catonella	HE681286_s	98.8	HE681286_s	100	Catonella_sp._HMT_451	0	0	0	3	0	0	1	0	0	0	0	0	15	0	0	0	8	1	0	0	0	3	0	0	0	0	0	1	0	16	0	0	0	0	0	0	18	0
	OTU726	Firmicutes	Negativicutes	Selenomonadales	Selenomonadaceae	Selenomonas	FJ773365_s	98.6	FJ773365_s	97.7	Selenomonas_artemidis	0	0	0	0	0	0	0	1	0	0	0	0	0	0	0	1	0	0	0	0	0	0	1	0	0	0	0	0	0	0	0	0	0	0	0	37	0	0
	OTU1010	Peregrinibacteria	Peribacteria	ASND_o	DQ413083_f	JN713562_g	JN713562_s	96.3	JN713562_s	99.8	Gracilibacteria_(GN02)_[G-2]_bacterium_HMT_873	0	0	0	0	0	0	1	0	0	0	0	0	0	0	0	0	0	0	0	0	0	0	0	0	0	0	0	0	0	0	0	0	0	0	0	0	0	0
	OTU1943	Spirochaetes	Spirochaetes_c	Spirochaetales	Spirochaetaceae	Treponema	Treponema_unclassified	97.4	AM420275_s Treponema_medium	98.8	Treponema_sp._HMT_237	0	0	0	0	0	0	0	0	0	0	0	0	0	0	0	0	0	0	0	0	0	0	0	0	0	0	0	0	0	0	0	0	0	0	0	0	0	0
	OTU678	Bacteroidetes	Bacteroidia	Bacteroidales	EU845084_f	AM419981_g	AM419981_s	99.3	AM419981_s	100	Bacteroidetes_[G-3]_bacterium_HMT_503	0	0	0	0	0	0	0	0	0	0	0	0	0	0	0	0	0	0	0	0	0	1	0	0	0	0	0	0	25	0	0	0	0	0	0	0	0	0
	OTU1454	Firmicutes	Clostridia	Clostridiales	Mogibacterium_f	Anaerovorax	HQ798989_s	99.5	HQ798989_s	98.8	Peptostreptococcaceae_[XI][G-5]_bacterium_HMT_493	0	0	0	0	0	0	0	0	0	0	0	0	0	0	0	0	0	69	0	0	0	0	0	0	0	0	0	0	0	0	0	0	0	0	0	0	0	0
	OTU859	Spirochaetes	Spirochaetes_c	Spirochaetales	Spirochaetaceae	Treponema	Treponema_unclassified	97.9	AF023063_s	100	Treponema_sp._HMT_242	0	0	0	0	0	0	0	0	0	0	0	0	0	0	0	0	1	0	0	0	0	0	0	0	0	0	0	0	0	0	0	0	0	0	0	0	0	0
	OTU1261	Fusobacteria	Fusobacteria_c	Fusobacteriales	Leptotrichiaceae	Leptotrichia	AF385572_s	99.5	AF385572_s	99.5	Leptotrichia_sp._HMT_219	0	0	0	0	0	0	0	0	0	0	0	0	0	0	0	0	0	5	0	0	0	0	0	0	0	0	0	0	0	0	0	0	0	0	0	0	0	0
	OTU739	Bacteroidetes	Bacteroidia	Bacteroidales	Bacteroidaceae	Bacteroides	Bacteroides_unclassified	93.4	Bacteroides_heparinolyticus	92.4	Bacteroides_heparinolyticus	0	0	0	0	0	0	0	0	0	0	0	0	0	0	0	0	0	0	0	0	0	0	0	0	0	0	0	62	0	0	0	0	0	0	0	0	0	0
	OTU1437	Peregrinibacteria	Peribacteria	ASND_o	ASND_f	ASND_g	FJ976283_s	99.8	FJ976283_s	100	Gracilibacteria_(GN02)_[G-1]_bacterium_HMT_872	0	0	0	0	0	0	0	0	0	0	0	0	0	0	0	0	1	0	0	0	0	0	0	0	0	0	0	0	0	0	0	0	0	0	0	0	0	0
	OTU646	SR1	CP006913_c	CP006913_o	CP006913_f	GU410548_g	GU410548_s	100	GU410548_s	100	Absconditabacteria_(SR1)_[G-1]_bacterium_HMT_345	0	0	0	0	0	0	0	0	0	0	0	0	0	0	0	0	0	0	0	0	0	0	0	0	0	0	0	0	0	0	0	0	0	0	0	0	0	0
	OTU1300	Saccharibacteria_TM7	Saccharimonas_c	Saccharimonas_o	Saccharimonas_f	Saccharimonas	Saccharimonas_unclassified	99	FJ976257_s	98.8	Saccharibacteria_(TM7)_[G-1]_bacterium_HMT_488	0	0	0	0	0	0	0	0	0	0	0	0	2	0	0	0	0	0	0	0	0	0	0	0	0	0	0	0	0	0	0	0	0	0	0	0	0	0
	OTU421	Actinobacteria	Actinobacteria_c	Actinomycetales	Actinomycetaceae	Actinomyces	Actinomyces_radingae	100	Actinomyces_radingae	94.3	Actinomyces_cardiffensis	0	0	0	0	0	0	0	0	0	0	0	0	0	0	0	0	0	0	0	0	0	0	0	0	0	0	0	0	0	0	0	2	58	0	0	0	0	0
	OTU598	Firmicutes	Clostridia	Clostridiales	Mogibacterium_f	JRNA_g	JRNA_s	99.5	JRNA_s	91.8	Peptostreptococcaceae_[XI][G-3]_bacterium_HMT_950	0	0	0	0	0	0	0	0	0	0	0	0	0	0	0	0	0	0	0	0	0	0	0	0	0	0	0	0	0	0	0	0	0	0	0	0	0	0
	OTU1349	Saccharibacteria_TM7	Saccharimonas_c	Saccharimonas_o	Saccharimonas_f	AJ400239_g	AF385506_s	97.8	AF385506_s	97.8	Saccharibacteria_(TM7)_[G-3]_bacterium_HMT_351	0	0	0	0	0	0	2	0	0	0	4	1	0	1	0	0	0	2	0	0	0	0	0	0	0	0	0	0	0	0	0	0	0	0	0	0	0	0
	OTU1083	Actinobacteria	Actinobacteria_c	Bifidobacteriales	Bifidobacteriaceae	Pseudoscardovia	Pseudoscardovia_suis	100	Pseudoscardovia_suis	95.1	Bifidobacterium_dentium	0	0	0	0	0	0	0	0	0	0	0	0	0	0	0	0	0	0	0	0	0	0	0	0	0	0	0	0	0	0	0	0	0	0	0	0	0	0
	OTU960	Bacteroidetes	Bacteroidia	Bacteroidales	Prevotellaceae	Prevotella	HQ716707_s	100	HQ716707_s	91.5	Prevotella_sp._HMT_317	0	0	0	0	0	0	0	0	0	0	0	0	0	0	0	0	0	0	0	0	0	0	0	57	0	0	0	0	0	0	0	0	0	0	0	0	0	0
	OTU1239	Bacteroidetes	Flavobacteria	Flavobacteriales	Flavobacteriaceae	Capnocytophaga	FJ773364_s	100	FJ773364_s	96.4	Capnocytophaga_granulosa	0	0	0	0	0	0	1	0	0	0	0	0	0	0	0	0	0	0	0	0	0	0	0	0	0	0	0	0	0	0	0	0	0	0	0	0	0	0
	OTU716	Spirochaetes	Spirochaetes_c	Spirochaetales	Spirochaetaceae	Treponema	Treponema_unclassified	98.4	AY369247_s JN713521_s	100	Treponema_sp._HMT_258	0	0	0	0	0	0	0	0	0	0	0	2	0	0	0	0	0	11	0	0	0	0	0	0	0	0	0	0	0	0	0	0	0	0	0	0	0	0
	OTU948	Bacteroidetes	Bacteroidia	Bacteroidales	S24-7_f	GU303868_g	GU303868_g_unclassified	93.6	FJ172864_s	90.7	Bacteroidetes_[G-7]_bacterium_HMT_911	0	0	0	0	0	0	0	0	0	0	37	0	0	0	0	0	0	0	0	0	0	0	0	0	0	0	0	0	0	0	0	0	0	0	0	0	0	0
	OTU1059	Bacteroidetes	Sphingobacteriia	Sphingobacteriales	Sphingobacteriaceae	Arcticibacter	Arcticibacter_pallidicorallinus	100	Arcticibacter_pallidicorallinus			0	0	0	0	0	0	0	0	0	0	0	0	0	0	0	0	0	0	0	0	0	0	0	0	0	0	0	0	0	0	53	0	0	0	0	0	0	0
	OTU1093	Tenericutes	Mollicutes	GU196243_o	FJ367735_f	EF586032_g	HE681226_s	99.3	HE681226_s	99.3	Mollicutes_[G-2]_bacterium_HMT_906	0	0	7	0	0	0	0	0	0	0	0	0	0	0	0	0	6	0	0	0	0	1	0	0	0	0	0	0	8	0	0	0	0	0	0	0	0	0
	OTU1084	Bacteroidetes	Bacteroidia	Bacteroidales	Prevotellaceae	Prevotella	Prevotella_loescheii	99.1	Prevotella_loescheii	99.3	Prevotella_loescheii	0	0	0	0	0	0	0	0	0	0	0	0	0	0	0	0	0	1	0	0	0	0	0	0	0	0	0	0	0	0	0	12	7	0	0	0	0	1
	OTU987	Firmicutes	Negativicutes	Acidaminococcales	Acidaminococcaceae	Acidaminococcus	Acidaminococcus_intestini	100	Acidaminococcus_intestini			0	0	0	0	0	0	0	0	0	0	17	0	0	0	0	0	0	0	0	0	0	0	0	0	0	0	0	0	0	0	0	0	0	0	0	0	0	0
	OTU588	Acidobacteria	Acidobacteriia	Acidobacteriales	Acidobacteriaceae	Edaphobacter	AB637074_s	100	AB637074_s			0	0	0	0	0	0	0	0	0	0	0	0	0	0	0	0	0	0	0	0	0	0	0	0	0	0	0	0	0	0	0	0	0	45	0	0	0	0
	OTU983	Spirochaetes	Spirochaetes_c	Spirochaetales	Spirochaetaceae	Treponema	JQ475531_s	99.1	JQ475531_s	95.6	Treponema_sp._HMT_508	0	0	0	0	0	0	0	0	0	0	1	2	0	0	0	0	0	0	0	0	0	0	0	0	0	0	0	0	0	0	0	0	0	0	0	0	0	0
	OTU1079	Firmicutes	Clostridia	Clostridiales	Mogibacterium_f	Mogibacterium_f_unclassified	Mogibacterium_f_unclassified	94	AY858394_s	91.3	Peptostreptococcaceae_[XI][G-3]_bacterium_HMT_950	0	0	0	0	0	0	0	0	0	0	0	0	0	0	0	0	0	0	1	3	0	0	0	0	0	0	0	0	40	0	0	0	0	0	0	0	0	0
	OTU1118	Firmicutes	Clostridia	Clostridiales	Lachnospiraceae	Catonella	AF287773_s	99.8	AF287773_s	99.8	Butyrivibrio_sp._HMT_090	0	0	0	0	0	0	0	0	0	0	24	0	0	0	1	0	0	0	0	0	0	0	0	0	0	0	0	0	0	0	0	0	0	0	0	0	0	0
	OTU862	Bacteroidetes	Bacteroidia	Bacteroidales	EU845084_f	EU845084_g	EU845084_g_unclassified	94.8	JQ406536_s	94.8	Bacteroidetes_[G-3]_bacterium_HMT_899	0	0	0	0	0	0	0	0	0	0	0	0	0	0	0	0	0	0	0	0	0	24	0	0	0	0	0	0	0	0	0	0	0	0	0	0	0	0
	OTU1194	Bacteroidetes	Bacteroidia	Bacteroidales	Porphyromonadaceae	AM420159_g	DQ003617_s	100	DQ003617_s	100	Bacteroidetes_[G-5]_bacterium_HMT_507	0	0	0	0	0	0	0	0	0	0	0	0	0	0	0	0	0	0	0	0	0	0	0	0	0	0	0	0	0	0	0	0	0	0	0	0	0	0
	OTU1399	Bacteroidetes	Flavobacteria	Flavobacteriales	Flavobacteriaceae	Bergeyella	AY958777_s	100	AY958777_s	99.8	Bergeyella_sp._HMT_907	0	0	0	0	0	0	0	0	0	0	0	0	0	0	0	0	0	0	0	0	0	0	0	0	0	0	0	0	0	0	0	0	0	0	0	21	0	0
	OTU1538	Firmicutes	Bacilli	Lactobacillales	Lactobacillaceae	Lactobacillus	Lactobacillus_plantarum	100	Lactobacillus_fabifermentans Lactobacillus_pentosus Lactobacillus_paraplantarum Lactobacillus_plantarum	100	Lactobacillus_plantarum	0	0	0	0	0	0	0	0	0	0	0	0	39	0	0	0	0	0	0	0	0	0	0	0	0	0	0	0	0	0	0	0	0	0	0	0	0	0
	OTU962	Firmicutes	Erysipelotrichi	Erysipelotrichales	Erysipelotrichaceae	AB009222_g	AB009222_g_unclassified	94.4	EF445265_s			0	0	18	0	0	0	0	0	0	0	0	0	0	0	0	0	0	0	0	1	0	0	0	0	0	0	0	0	0	0	0	0	0	0	0	0	0	0
	OTU1743	Actinobacteria	Actinobacteria_c	Bifidobacteriales	Bifidobacteriaceae	Bifidobacterium	Bifidobacterium_merycicum	99.8	Bifidobacterium_merycicum	97.1	Bifidobacterium_dentium	0	0	0	0	0	0	0	0	2	0	0	0	0	0	0	0	0	0	0	0	0	0	0	0	0	0	0	0	0	0	0	0	11	0	0	0	0	4
	OTU989	Bacteroidetes	Bacteroidia	Bacteroidales	S24-7_f	EF406806_g	EU622644_s	99.1	EU622644_s			1	0	0	0	0	0	0	0	0	0	0	0	0	0	0	0	0	0	0	0	0	0	0	0	0	0	0	0	0	0	0	0	0	0	0	0	0	0
	OTU1244	Firmicutes	Negativicutes	Selenomonadales	Selenomonadaceae	Mitsuokella	KI273068_s	99.8	KI273068_s	100	Mitsuokella_sp._HMT_131	0	0	0	0	0	0	1	0	0	0	0	4	6	0	0	0	5	0	0	0	1	0	0	0	0	0	0	0	0	1	0	0	0	0	0	0	0	8
	OTU1292	Spirochaetes	Spirochaetes_c	Spirochaetales	Spirochaetaceae	Treponema	GQ422733_s	100	GQ422733_s	100	Treponema_sp._HMT_270	0	0	0	0	0	0	0	0	0	0	0	1	0	0	0	0	0	0	0	0	0	0	0	0	0	0	0	0	0	0	0	0	0	0	0	0	0	0
	OTU1103	Firmicutes	Tissierellia	Tissierellales	Peptoniphilaceae	Murdochiella	EU844467_s	99.5	EU844467_s			0	0	0	0	0	0	0	0	0	0	0	0	0	0	0	0	0	0	0	31	0	0	0	0	0	0	0	0	0	0	0	0	0	0	0	0	0	0
	OTU1255	Bacteroidetes	Bacteroidia	Bacteroidales	Prevotellaceae	Prevotella	FJ470476_s	94.3	Prevotella_shahii	100	Prevotella_sp._HMT_475	0	0	0	0	0	0	0	0	0	0	0	1	0	0	0	0	0	0	0	0	30	0	0	0	0	0	0	0	0	0	0	0	0	0	0	0	0	0
	OTU1216	Firmicutes	Negativicutes	Veillonellales	Veillonellaceae	Dialister	Dialister_micraerophilus	99.3	Dialister_micraerophilus	99.3	Dialister_micraerophilus	0	0	0	30	0	0	0	0	0	0	0	0	0	0	0	0	0	0	0	0	0	0	0	0	0	0	0	0	0	0	0	0	0	0	0	0	0	0
	OTU1121	Firmicutes	Negativicutes	Veillonellales	Veillonellaceae	Dialister	AF287786_s	99.5	AF287786_s	100	Dialister_sp._HMT_119	0	0	0	0	0	0	0	0	0	0	0	0	0	0	0	0	0	0	0	0	0	0	0	0	0	0	0	0	0	0	0	0	0	0	0	0	0	14
	OTU865	Firmicutes	Clostridia	Clostridiales	Syntrophomonadaceae	AY341821_g	AY341821_s	100	AY341821_s	100	Syntrophomonadaceae_[VIII][G-1]_bacterium_HMT_435	0	0	0	0	0	0	0	0	0	0	0	0	0	0	0	0	0	3	22	0	0	2	0	0	0	0	0	0	0	0	0	0	0	0	0	0	0	0
	OTU1269	Firmicutes	Clostridia	Clostridiales	Lachnospiraceae	KE159538_g	KE159538_g_unclassified	96.9	EU455566_s			0	0	0	0	0	0	0	0	0	0	0	0	0	0	0	0	0	0	0	0	0	0	0	0	0	0	0	0	0	0	0	0	0	0	0	29	0	0
	OTU526	Firmicutes	Bacilli	Lactobacillales	Lactobacillaceae	Lactobacillus	Lactobacillus_salivarius	100	Lactobacillus_salivarius	100	Lactobacillus_salivarius	0	0	0	2	0	0	0	0	0	0	7	1	0	0	0	0	0	0	0	0	0	0	0	0	0	0	0	0	0	0	0	0	0	0	0	0	0	0
	OTU751	Bacteroidetes	Bacteroidia	Bacteroidales	Porphyromonadaceae	Porphyromonas	JF178899_s	100	JF178899_s	90.6	Porphyromonas_endodontalis	0	0	0	0	0	0	0	0	0	0	0	0	0	0	0	0	0	0	0	0	0	0	0	0	0	0	0	0	0	0	0	0	0	0	0	0	0	0
	OTU1160	Proteobacteria	Gammaproteobacteria	Pasteurellales	Pasteurellaceae	Pasteurellaceae_unclassified	Pasteurellaceae_unclassified	98.8	Haemophilus_paraphrohaemolyticus	99.3	Haemophilus_parahaemolyticus	0	0	0	0	0	0	0	0	0	0	0	0	0	0	0	0	0	0	0	0	0	0	0	0	0	0	0	0	0	0	0	0	0	0	0	0	0	0
	OTU1521	Saccharibacteria_TM7	Saccharimonas_c	Saccharimonas_o	Saccharimonas_f	AF432141_g	AF432141_s	98.8	AF432141_s	99.5	Saccharibacteria_(TM7)_[G-6]_bacterium_HMT_870	0	0	0	0	0	0	0	0	0	0	0	0	0	0	0	0	0	1	0	0	0	0	0	0	0	0	0	0	0	0	0	0	0	0	0	0	0	0
	OTU1449	Armatimonadetes	AB374370_c	AB374370_o	AB374370_f	AB374370_f_unclassified	AB374370_f_unclassified	91.4	PAC000296_s			0	0	0	0	0	0	0	0	0	0	0	0	0	0	0	0	0	0	0	0	0	0	0	0	0	0	22	0	0	0	0	0	0	0	0	0	0	0
	OTU1777	Proteobacteria	Betaproteobacteria	Burkholderiales	Comamonadaceae	Pelomonas	Pelomonas_unclassified	99.8	Pelomonas_aquatica	95.1	Leptothrix_sp._HMT_025	0	0	0	0	0	0	0	0	0	0	0	0	0	0	0	0	0	0	0	0	0	0	0	0	0	0	0	0	0	0	0	0	0	21	0	0	0	0
	OTU446	Firmicutes	Bacilli	Lactobacillales	Enterococcaceae	Enterococcus	Enterococcus_cecorum	99.8	Enterococcus_cecorum	97.7	Enterococcus_casseliflavus	0	0	0	0	0	0	0	0	0	0	0	0	1	0	0	0	0	0	0	0	0	0	0	0	0	1	0	0	0	0	0	4	10	0	0	0	0	0
	OTU1755	Actinobacteria	Actinobacteria_c	Corynebacteriales	Corynebacteriaceae	Corynebacterium	Corynebacterium_unclassified	100	Corynebacterium_kroppenstedtii	100	Corynebacterium_kroppenstedtii	0	0	0	0	0	0	0	0	0	0	0	0	0	0	0	0	0	0	0	0	0	0	0	0	0	0	0	1	0	0	0	0	0	0	0	0	0	0
	OTU1124	Firmicutes	Bacilli	Lactobacillales	Lactobacillaceae	Lactobacillus	Lactobacillus_delbrueckii	100	Lactobacillus_delbrueckii	97.7	Lactobacillus_ultunensis	0	0	0	13	0	0	0	0	0	0	0	0	0	0	0	4	0	0	0	1	0	0	0	0	0	0	0	0	0	1	0	0	0	0	0	0	0	0
	OTU1768	Actinobacteria	Actinobacteria_c	Kineosporiales	Kineosporiaceae	Aquipuribacter	Aquipuribacter_hungaricus	99.8	Aquipuribacter_hungaricus	93.1	Micrococcus_luteus	0	0	0	0	0	0	0	0	0	0	0	0	0	0	0	0	0	19	0	0	0	0	0	0	0	0	0	0	0	0	0	0	0	0	0	0	0	0
	OTU1106	Saccharibacteria_TM7	Saccharimonas_c	Saccharimonas_o	Saccharimonas_f	AF125206_g	AF125206_g_unclassified	95	AF125206_s	95.5	Saccharibacteria_(TM7)_[G-5]_bacterium_HMT_356	0	0	0	0	0	0	0	0	0	0	0	0	0	0	0	0	0	0	0	0	0	0	0	0	0	0	0	0	0	0	0	0	0	18	0	0	0	0
	OTU1389	Bacteroidetes	Bacteroidia	Bacteroidales	Prevotellaceae	Prevotella	Prevotella_marshii	100	Prevotella_marshii	100	Prevotella_marshii	0	0	0	0	0	0	3	0	0	0	2	1	0	0	0	0	0	2	0	0	4	0	0	0	0	0	0	0	0	0	0	0	0	0	0	0	0	0
	OTU1048	Bacteroidetes	Bacteroidia	Bacteroidales	Prevotellaceae	Prevotella	JXQJ_s	99.8	JXQJ_s			0	0	0	0	0	0	0	0	0	1	0	0	0	0	0	0	0	0	0	0	0	0	0	0	0	0	0	0	0	0	0	0	0	0	0	0	0	0
	OTU1065	Firmicutes	Bacilli	Lactobacillales	Lactobacillaceae	Lactobacillus	Lactobacillus_fermentum	100	Lactobacillus_fermentum	100	Lactobacillus_fermentum	0	0	0	0	0	0	1	0	0	0	0	0	0	0	0	0	0	0	0	0	0	0	0	0	0	0	0	0	0	1	0	0	0	0	0	0	0	0
	OTU1231	Firmicutes	Tissierellia	Tissierellales	Tissierellaceae	AY134899_g	AY134899_s	99.8	AY134899_s	99.8	Peptoniphilaceae_[G-2]_bacterium_HMT_790	0	0	0	0	0	0	0	0	0	0	0	0	0	0	0	0	0	0	0	0	0	3	0	0	0	0	0	0	0	0	0	0	0	0	0	0	0	0
	OTU553	Proteobacteria	Betaproteobacteria	Neisseriales	Neisseriaceae	Neisseriaceae_unclassified	Neisseriaceae_unclassified	96.7	Kingella_denitrificans	99.5	Eikenella_sp._HMT_011	0	0	0	0	0	0	0	0	0	0	0	0	0	1	0	0	0	0	0	0	0	0	0	0	0	0	0	0	0	0	0	0	0	0	0	0	0	0
	OTU849	Proteobacteria	Betaproteobacteria	Burkholderiales	Comamonadaceae	Curvibacter	Curvibacter_lanceolatus	99.8	Curvibacter_lanceolatus	95.8	Acidovorax_temperans	0	0	0	0	0	0	0	0	0	0	0	0	0	0	0	0	0	0	0	0	0	0	0	0	0	0	0	0	0	0	0	0	0	0	0	0	0	0
	OTU351	Firmicutes	Clostridia	Clostridiales	Lachnospiraceae	AF287775_g	AM420198_s	99.8	AM420198_s	95.3	Lachnoanaerobaculum_sp._HMT_083	0	0	0	0	0	0	0	0	0	0	0	0	0	0	0	0	0	5	0	0	0	0	0	0	0	0	0	0	0	0	0	0	0	0	0	0	0	0
	OTU1582	Actinobacteria	Thermoleophilia	Thermoleophilales	Thermoleophilaceae	EU289467_g	EU133100_s	99.5	EU133100_s			0	0	0	0	0	0	0	0	0	0	0	0	0	0	0	0	0	0	0	0	0	0	0	0	0	0	14	0	0	0	0	0	0	0	0	0	0	0
	OTU1203	Bacteroidetes	Bacteroidia	Bacteroidales	Prevotellaceae	Prevotella	AF537212_s	100	AF537212_s	100	Prevotella_sp._HMT_820	0	0	0	0	0	0	5	0	0	0	0	1	0	0	0	0	0	0	0	0	0	0	0	0	0	0	0	0	0	0	0	0	0	0	0	0	0	0
	OTU2023	Firmicutes	Clostridia	Clostridiales	Lachnospiraceae	Shuttleworthia	Shuttleworthia_satelles	92.3	Shuttleworthia_satelles	92.1	Shuttleworthia_satelles	0	0	0	3	0	0	1	0	0	0	0	0	0	0	0	0	0	0	0	0	0	0	0	0	0	0	2	0	0	0	0	0	0	0	0	0	0	0
	OTU1517	Firmicutes	Negativicutes	Veillonellales	Veillonellaceae	Dialister	Allisonella_histaminiformans	99.1	Allisonella_histaminiformans	93	Dialister_pneumosintes	0	0	0	0	0	0	0	0	0	0	0	0	0	0	0	0	0	0	0	0	0	0	0	0	0	0	0	0	0	0	0	0	0	0	0	0	0	0
	OTU1404	Saccharibacteria_TM7	Saccharimonas_c	Saccharimonas_o	Saccharimonas_f	AJ400239_g	AJ400239_g_unclassified	98.5	PAC000677_s	94.6	Saccharibacteria_(TM7)_[G-3]_bacterium_HMT_351	0	0	0	0	0	0	0	0	0	0	0	0	0	0	0	0	0	0	0	0	0	5	0	0	0	0	0	0	0	0	0	0	0	0	0	0	0	0
	OTU1866	Firmicutes	Clostridia	Clostridiales	Ruminococcaceae	Ruminococcus_g2	HQ400208_s	99.8	HQ400208_s			0	0	0	0	0	0	0	0	0	0	0	0	0	0	0	0	0	0	0	0	0	0	0	0	0	0	0	0	0	0	0	0	0	0	0	0	0	0
	OTU1325	Proteobacteria	Betaproteobacteria	Burkholderiales	Comamonadaceae	Ottowia	AM419986_s	99.8	AM419986_s	100	Ottowia_sp._HMT_894	0	0	0	0	0	0	0	0	0	0	0	0	0	0	0	0	1	0	0	0	0	0	0	0	0	0	0	0	0	0	0	0	0	0	0	0	0	0
	OTU1535	Spirochaetes	Spirochaetes_c	Spirochaetales	Spirochaetaceae	Treponema	Treponema_unclassified	90.6	Treponema_succinifaciens	95.3	Treponema_sp._HMT_927	0	0	0	0	0	0	0	0	0	0	0	1	0	0	0	0	0	0	0	0	0	0	0	0	0	0	0	0	0	0	0	0	0	0	0	0	0	0
	OTU1386	Bacteroidetes	Bacteroidia	Bacteroidales	Bacteroidaceae	Bacteroides	Bacteroides_unclassified	91.9	Bacterium_zoogleiformans	92.2	Bacteroides_heparinolyticus	0	0	1	0	0	0	0	0	0	0	0	0	0	0	0	0	0	0	0	0	0	0	0	0	0	0	0	0	0	0	0	1	0	0	0	0	0	0
	OTU1910	Acidobacteria	CP015136_c	CP015136_o	CP015136_f	Z95727_g	Z95727_g_unclassified	98.4	FJ479598_s			0	0	0	0	0	0	0	0	0	0	0	0	0	0	0	0	0	0	0	0	0	0	0	0	0	0	11	0	0	0	0	0	0	0	0	0	0	0
	OTU699	Firmicutes	Negativicutes	Veillonellales	Veillonellaceae	Veillonella	Veillonella_atypica	98.8	Veillonella_atypica	99.8	Veillonella_atypica	0	0	0	8	0	0	0	0	0	0	0	0	0	0	0	0	0	0	0	0	0	0	0	0	0	0	0	0	0	0	0	0	0	0	0	0	0	0
	OTU909	Actinobacteria	Actinobacteria_c	Propionibacteriales	Propionibacteriaceae	Propionibacterium	AF287757_s	99.8	AF287757_s	100	Pseudopropionibacterium_sp._HMT_194	0	0	0	0	0	0	0	0	0	0	0	0	0	0	0	0	0	0	0	0	0	0	0	0	0	0	0	0	0	0	0	0	0	0	0	0	0	0
	OTU1345	Firmicutes	Clostridia	Clostridiales	Ruminococcaceae	Eubacterium_g23	JQ191123_s	99	JQ191123_s			0	0	0	0	0	0	0	0	0	0	0	0	0	0	0	0	0	0	0	0	0	0	0	0	0	0	0	0	0	0	0	0	0	0	0	0	0	0
	OTU1689	Actinobacteria	Actinobacteria_c	Propionibacteriales	Propionibacteriaceae	Propionibacterium	Propionibacterium_acidifaciens	95.1	Propionibacterium_acidifaciens	95.1	Acidipropionibacterium_acidifaciens	0	0	0	0	0	0	0	0	0	0	0	0	0	0	0	0	0	0	0	0	0	0	0	0	0	0	0	0	0	0	0	8	0	0	0	0	0	0
	OTU1522	Firmicutes	Negativicutes	Selenomonadales	Selenomonadaceae	Selenomonas	AY349409_s	98.6	AY349409_s	98.6	Selenomonas_sp._HMT_501	0	0	0	0	0	0	0	0	0	0	0	0	0	0	0	0	1	0	0	0	0	0	0	0	0	0	0	0	0	0	0	1	0	0	0	0	0	0
	OTU1724	Firmicutes	Clostridia	Clostridiales	Lachnospiraceae	Lachnospiraceae_unclassified	Lachnospiraceae_unclassified	96.5	JN713301_s	91.4	Shuttleworthia_satelles	0	0	0	0	0	0	0	0	0	0	3	1	0	0	0	0	0	3	0	0	0	0	0	0	0	0	0	0	0	0	0	0	0	0	0	0	0	0
	OTU1964	Bacteroidetes	Sphingobacteriia	Sphingobacteriales	Sphingobacteriaceae	Pedobacter	Pedobacter_unclassified	98.3	Pedobacter_xixiisoli Pedobacter_cryoconitis	98.1	Pedobacter_sp._HMT_321	0	0	0	0	0	0	0	0	0	0	0	0	0	0	0	0	0	0	0	0	0	0	0	0	0	0	7	0	0	0	0	0	0	0	0	0	0	0
	OTU1775	Tenericutes	Mollicutes	Acholeplasmatales	Acholeplasmataceae	Mycoplasma_g17	JN935868_s	98.6	JN935868_s			0	0	0	0	0	0	0	0	0	0	0	0	0	0	0	0	0	0	0	0	0	0	0	0	0	3	0	0	4	0	0	0	0	0	0	0	0	0
	OTU2102	Proteobacteria	Alphaproteobacteria	Sphingomonadales	Sphingomonadaceae	Novosphingobium	Novosphingobium_rosa	99.8	Novosphingobium_rosa	95.8	Porphyrobacter_tepidarius	0	0	0	0	0	0	0	0	0	0	0	0	0	0	0	0	0	0	0	0	0	0	0	0	0	0	0	0	0	0	0	0	0	0	0	0	0	0
	OTU1196	Firmicutes	Bacilli	Lactobacillales	Lactobacillaceae	Lactobacillus	Lactobacillus_coleohominis	100	Lactobacillus_coleohominis	100	Lactobacillus_coleohominis	0	0	0	0	0	0	6	0	0	0	0	0	0	0	0	0	0	0	0	0	0	0	0	0	0	0	0	0	0	0	0	0	0	0	0	0	0	0
	OTU1453	Bacteroidetes	Bacteroidia	Bacteroidales	S24-7_f	DQ824928_g	EU458423_s	99.5	EU458423_s			0	0	0	0	0	0	0	0	0	0	0	0	0	0	0	0	0	0	0	0	0	0	0	0	0	0	0	0	0	0	0	0	0	0	0	0	0	0
	OTU1765	Firmicutes	Clostridia	Clostridiales	Clostridiales_unclassified	Clostridiales_unclassified	Clostridiales_unclassified	91.3	EF686634_s			0	0	0	0	0	0	0	0	0	0	0	0	0	0	0	0	0	0	0	0	0	0	0	0	0	0	0	0	0	0	0	0	0	0	0	0	0	0
	OTU1737	Spirochaetes	Spirochaetes_c	Spirochaetales	Spirochaetaceae	Treponema	AF385499_s	99.3	AF385499_s	99.8	Treponema_sp._HMT_239	0	0	0	0	0	0	0	0	0	0	0	2	0	0	0	0	0	0	0	0	0	0	0	0	0	0	0	0	0	0	0	0	0	0	0	0	0	0
	OTU1175	Proteobacteria	Gammaproteobacteria	Pseudomonadales	Pseudomonadaceae	Pseudomonas	Pseudomonas_unclassified	99.3	Pseudomonas_congelans Pseudomonas_syringae Pseudomonas_ficuserectae	94.4	Pseudomonas_sp._HMT_032	0	0	0	0	0	2	0	0	0	0	0	0	1	0	0	0	0	0	0	0	0	0	1	0	0	0	0	0	0	0	0	0	0	0	0	0	0	0
	OTU1490	Firmicutes	Bacilli	Lactobacillales	Lactobacillaceae	Lactobacillus	Lactobacillus_hilgardii	99.8	Lactobacillus_farraginis	98.8	Lactobacillus_kisonensis	0	0	0	3	0	0	2	0	0	0	0	0	0	0	0	0	0	0	0	0	0	0	0	0	0	0	0	0	0	0	0	0	0	0	0	0	0	0
	OTU1793	Proteobacteria	Deltaproteobacteria	Bdellovibrionales	AB511016_f	AB511016_g	JN229898_s	98.6	JN229898_s			0	0	0	0	0	0	0	0	5	0	0	0	0	0	0	0	0	0	0	0	0	0	0	0	0	0	0	0	0	0	0	0	0	0	0	0	0	0
	OTU1991	Bacteroidetes	Bacteroidia	Bacteroidales	Prevotellaceae	Prevotella	Prevotella_pallens	99.1	Prevotella_pallens	99.1	Prevotella_pallens	0	0	0	0	0	0	0	0	0	0	0	1	0	0	0	0	0	0	0	0	0	0	0	0	0	0	0	0	0	0	0	0	0	0	0	0	0	0
	OTU1167	Cyanobacteria	Vampirovibrio_c	FR888536_o	FR888536_f	FR888536_g	FR888536_g_unclassified	97.3	EU622698_s			0	0	0	0	0	0	0	0	0	0	0	0	0	0	0	0	0	0	0	0	0	4	0	0	0	0	0	0	0	0	0	0	0	0	0	0	0	0
	OTU1642	Firmicutes	Negativicutes	Acidaminococcales	Acidaminococcaceae	Acidaminococcus	Acidaminococcus_unclassified	97.9	Acidaminococcus_fermentans			0	0	0	0	0	0	0	0	0	0	0	0	0	0	0	0	0	0	0	0	0	1	0	0	0	0	0	0	0	0	0	0	0	0	0	0	0	0
	OTU2200	Firmicutes	Clostridia	Clostridiales	Mogibacterium_f	Mogibacterium_f_unclassified	Mogibacterium_f_unclassified	94	JX222045_s	90.1	Peptostreptococcaceae_[XI][G-1]_sulci	0	0	0	0	0	0	0	0	0	4	0	0	0	0	0	0	0	0	0	0	0	0	0	0	0	0	0	0	0	0	0	0	0	0	0	0	0	0
	OTU1017	Firmicutes	Clostridia	Clostridiales	Ruminococcaceae	Eubacterium_g23	DQ394651_s	100	DQ394651_s			0	0	0	0	0	0	0	0	0	0	0	0	0	0	0	0	0	0	0	0	0	0	0	0	0	0	0	0	0	0	0	0	0	0	0	0	0	0
	OTU1188	Fusobacteria	Fusobacteria_c	Fusobacteriales	Leptotrichiaceae	Sneathia	AJ289183_s	99.8	AJ289183_s	95.8	Sneathia_sanguinegens	0	0	0	0	0	0	2	0	0	0	0	0	0	0	0	0	0	0	0	0	0	0	0	0	0	0	0	0	0	0	0	0	0	0	0	0	0	0
	OTU1227	Proteobacteria	Betaproteobacteria	Burkholderiales	Sutterellaceae	Parasutterella	Parasutterella_unclassified	97	EF401724_s EU771274_s	90.6	Schlegelella_thermodepolymerans	0	0	0	0	0	0	0	0	3	0	0	0	0	0	0	0	0	0	0	0	0	0	0	0	0	0	0	0	0	0	0	0	0	0	0	0	0	0
	OTU1388	Saccharibacteria_TM7	Saccharimonas_c	Saccharimonas_o	Saccharimonas_f	AF125205_g	AF125205_s	99.5	AF125205_s	100	Saccharibacteria_(TM7)_[G-4]_bacterium_HMT_355	0	0	0	0	0	0	0	0	0	0	2	0	0	0	0	0	0	0	0	0	0	0	0	0	0	0	0	0	0	0	0	0	0	0	0	0	0	0
	OTU2082	Actinobacteria	Actinobacteria_c	Micrococcales	Demequinaceae	Demequinaceae_unclassified	Demequinaceae_unclassified	98	Lysinimicrobium_luteum Demequina_aestuarii Demequina_activiva	94.1	Kocuria_palustris	0	0	0	0	0	0	0	0	3	0	0	0	0	0	0	0	0	0	0	0	0	0	0	0	0	0	0	0	0	0	0	0	0	0	0	0	0	0
	OTU1753	Bacteroidetes	Bacteroidia	Bacteroidales	EU845084_f	AB494828_g	AB494828_g_unclassified	95	EU344490_s			0	0	0	0	0	0	0	0	3	0	0	0	0	0	0	0	0	0	0	0	0	0	0	0	0	0	0	0	0	0	0	0	0	0	0	0	0	0
	OTU1935	Proteobacteria	Epsilonproteobacteria	Campylobacterales	Helicobacteraceae	Wolinella	Wolinella_succinogenes	100	Wolinella_succinogenes	92.8	Helicobacter_pylori	0	0	0	0	0	0	0	0	0	0	0	0	0	0	0	0	0	0	0	0	0	0	0	0	0	0	0	0	0	0	0	0	0	0	0	0	0	0
	OTU278	Actinobacteria	Actinobacteria_c	Actinomycetales	Actinomycetaceae	Actinomyces	EF688243_s	100	EF688243_s	90.6	Actinomyces_sp._HMT_175	0	0	0	0	0	0	0	0	0	0	0	0	0	0	0	0	0	0	0	0	0	0	0	0	0	0	0	0	1	0	0	0	0	0	0	0	0	0
	OTU1145	Firmicutes	Clostridia	Clostridiales	Ruminococcaceae	Eubacterium_g23	Eubacterium_g23_unclassified	97.3	EU794105_s EU467305_s EU381669_s			0	0	0	0	0	0	0	0	0	0	0	0	0	0	0	0	0	0	0	0	0	0	0	0	0	0	0	0	0	0	0	0	0	0	0	0	0	0
	OTU1355	Firmicutes	Clostridia	Clostridiales	Lachnospiraceae	AF287768_g	AF287768_s	99.3	AF287768_s	99.3	Lachnospiraceae_[G-10]_bacterium_HMT_094	0	0	0	0	0	0	0	0	0	0	0	0	0	0	0	0	0	0	0	0	0	0	0	0	0	0	0	2	0	0	0	0	0	0	0	0	0	0
	OTU1524	Spirochaetes	Spirochaetes_c	Spirochaetales	Spirochaetaceae	Treponema	AF182836_s	99.5	AF182836_s	100	Treponema_sp._HMT_254	0	0	0	0	0	0	0	0	0	0	0	2	0	0	0	0	0	0	0	0	0	0	0	0	0	0	0	0	0	0	0	0	0	0	0	0	0	0
	OTU1727	Spirochaetes	Spirochaetes_c	Spirochaetales	Spirochaetaceae	Treponema	DQ003618_s	98.8	DQ003618_s	99.1	Treponema_sp._HMT_508	0	0	0	0	0	0	0	0	0	0	0	2	0	0	0	0	0	0	0	0	0	0	0	0	0	0	0	0	0	0	0	0	0	0	0	0	0	0
	OTU1543	Bacteroidetes	Bacteroidia	Bacteroidales	S24-7_f	S24-7_f_unclassified	S24-7_f_unclassified	92.6	FJ881242_s			0	0	1	0	0	0	0	0	0	0	0	0	0	0	0	0	0	0	0	0	0	0	0	0	1	0	0	0	0	0	0	0	0	0	0	0	0	0
	OTU1720	Firmicutes	Clostridia	Clostridiales	Christensenellaceae	Catabacter	Catabacter_hongkongensis	100	Catabacter_hongkongensis			0	0	0	0	0	0	0	0	0	0	0	0	0	0	0	0	0	0	0	0	0	0	0	0	0	0	0	0	0	0	0	0	0	0	0	0	0	0
	OTU1927	Bacteroidetes	Bacteroidia	Bacteroidales	Prevotellaceae	Prevotella	Prevotella_unclassified	92.7	AF371896_s	91.7	Prevotella_sp._HMT_309	0	0	0	0	0	0	0	0	0	0	0	0	0	0	0	0	0	0	0	0	0	0	0	0	0	0	0	0	0	0	0	0	0	0	0	0	0	0
	OTU1899	Verrucomicrobia	Opitutae	FN377789_o	FN377789_f	AB522156_g	AB522156_g_unclassified	90.3	AB299565_s			0	0	0	0	0	0	0	0	2	0	0	0	0	0	0	0	0	0	0	0	0	0	0	0	0	0	0	0	0	0	0	0	0	0	0	0	0	0
	OTU2063	Firmicutes	Clostridia	Clostridiales	Ruminococcaceae	Ruminococcaceae_unclassified	Ruminococcaceae_unclassified	93.5	HQ783648_s JX198600_s FJ269107_s			0	0	0	0	0	0	2	0	0	0	0	0	0	0	0	0	0	0	0	0	0	0	0	0	0	0	0	0	0	0	0	0	0	0	0	0	0	0
	OTU597	Bacteroidetes	Bacteroidia	Bacteroidales	Bacteroidaceae	Bacteroides	Bacteroides_coprocola	99.8	Bacteroides_coprocola	90.5	Bacteroides_heparinolyticus	0	0	0	0	0	0	0	0	0	0	0	0	0	0	0	0	0	0	0	0	0	1	0	0	0	0	0	0	0	0	0	0	0	0	0	0	0	0
	OTU779	Firmicutes	Negativicutes	Veillonellales	Veillonellaceae	Megasphaera	Megasphaera_unclassified	97	AF287784_s	96.7	Megasphaera_sp._HMT_123	0	0	0	0	0	0	0	0	0	0	0	0	0	0	0	0	0	0	0	0	0	0	0	0	0	0	0	0	0	0	0	0	0	0	0	0	0	0
	OTU981	Proteobacteria	Betaproteobacteria	Burkholderiales	Alcaligenaceae	Kerstersia	Kerstersia_similis	99.1	Kerstersia_similis	96.3	Bordetella_pertussis	0	0	0	0	0	0	0	0	0	0	0	0	0	0	0	0	0	0	0	0	0	0	0	0	0	0	0	0	0	0	0	0	0	0	0	0	0	0
	OTU1022	Bacteroidetes	Cytophagia	Cytophagales	Hymenobacteraceae	Hymenobacter	Hymenobacter_tibetensis	99.5	Hymenobacter_tibetensis			0	0	0	0	0	0	0	0	0	0	0	0	0	0	0	0	0	0	0	0	0	0	0	0	0	0	0	0	0	0	0	0	0	0	0	0	0	0
	OTU845	Firmicutes	Clostridia	Clostridiales	Ruminococcaceae	Pseudoflavonifractor	EU794285_s	100	EU794285_s	90.6	Fastidiosipila_sanguinis	0	0	0	0	0	0	0	0	0	0	0	0	0	0	0	0	0	0	0	0	0	0	0	0	0	0	0	0	0	0	0	0	0	0	0	0	0	0
	OTU1273	Bacteroidetes	Bacteroidia	Bacteroidales	EU845084_f	EU845084_g	HQ716619_s	99.3	HQ716619_s			0	0	0	0	0	0	0	0	0	0	0	0	0	0	0	0	0	0	0	0	0	0	0	0	1	0	0	0	0	0	0	0	0	0	0	0	0	0
	OTU1314	Tenericutes	Mollicutes	Acholeplasmatales	Acholeplasmataceae	Mycoplasma_g17	JN713337_s	92.7	JN713337_s			0	0	0	0	0	0	0	0	0	0	0	1	0	0	0	0	0	0	0	0	0	0	0	0	0	0	0	0	0	0	0	0	0	0	0	0	0	0
	OTU1459	Firmicutes	Erysipelotrichi	Erysipelotrichales	Erysipelotrichaceae	AB009222_g	EF445265_s	94.8	EF445265_s			0	0	0	0	0	0	0	0	0	0	0	0	0	0	0	0	0	0	0	0	0	0	0	0	0	0	0	0	0	0	0	0	0	0	0	0	0	0
	OTU1665	Bacteroidetes	Bacteroidia	Bacteroidales	Prevotellaceae	Prevotella	GU303928_s	99.3	GU303928_s			0	0	0	0	0	0	0	0	0	0	0	0	0	0	0	0	0	0	0	0	0	0	0	0	0	0	0	0	0	0	0	0	0	0	0	0	0	0
	OTU1514	Bacteroidetes	Bacteroidia	Bacteroidales	Prevotellaceae	CF231_g	CF231_g_unclassified	96.2	EU776345_s			0	0	0	0	0	0	0	0	0	0	0	0	0	0	0	0	0	0	0	0	0	0	0	0	0	0	0	0	0	0	0	0	0	0	0	0	0	0
	OTU1607	Firmicutes	Clostridia	Clostridiales	Christensenellaceae	JX095379_g	JX095379_s	96.3	JX095379_s			0	0	1	0	0	0	0	0	0	0	0	0	0	0	0	0	0	0	0	0	0	0	0	0	0	0	0	0	0	0	0	0	0	0	0	0	0	0
	OTU1764	Tenericutes	Mollicutes	AM275436_o	AM275436_f	EU381695_g	AF432140_s	100	AF432140_s			0	0	0	0	0	0	1	0	0	0	0	0	0	0	0	0	0	0	0	0	0	0	0	0	0	0	0	0	0	0	0	0	0	0	0	0	0	0
	OTU2180	Firmicutes	Clostridia	Clostridiales	Ruminococcaceae	JN713389_g	AM419970_s	99.5	AM419970_s	95.3	Ruminococcaceae_[G-1]_bacterium_HMT_075	0	0	0	0	0	0	0	0	0	0	0	0	0	0	0	0	0	0	0	0	0	0	0	0	0	0	0	0	0	0	0	0	0	0	0	0	0	0
	OTU1781	Chloroflexi	Thermomicrobia	DQ129389_o	DQ129389_f	DQ129389_g	DQ129389_g_unclassified	99.3	FJ671502_s			0	0	0	0	1	0	0	0	0	0	0	0	0	0	0	0	0	0	0	0	0	0	0	0	0	0	0	0	0	0	0	0	0	0	0	0	0	0
	OTU2177	Actinobacteria	Actinobacteria_c	Streptomycetales	Streptomycetaceae	Streptomyces	Streptomyces_unclassified	100	Streptomyces_baliensis Streptomyces_ferralitis Streptomyces_paucisporeus	94.1	Kocuria_palustris	0	0	0	0	0	0	0	0	0	0	0	0	0	0	0	0	0	0	0	0	0	1	0	0	0	0	0	0	0	0	0	0	0	0	0	0	0	0
	a Reads were classified with mothur usnig Wang approach and EzBioCloud database
	b Sample ID contains a description of the pathology (PAP, primary apical periodintitis; SAP, secondary apical peridontitis) followed by patient number and sample type (C, canal; D, dentin)
[truncated: 26 more columns]
